# Supplementary material for: Double carboxylation of o-alkynyl acetophenone with carbon dioxide
Source: Royal Society of Chemistry journal article supplement (doi:10.1039/c5qo00374a), 2015-12-08

## Supporting Information

# Double Carboxylation of *o*-Alkynyl Acetophenone with Carbon Dioxide

Wen-Zhen Zhang,\* Ming-Wang Yang, Xu-Tong Yang, Ling-Long Shi, Hui-Bo Wang,  
and Xiao-Bing Lu

Key Laboratory of Fine Chemicals, Dalian University of Technology, Dalian 116012, China

*E-mail: zhangwz@dlut.edu.cn*

### Table of Contents

|                                                                              |    |
|------------------------------------------------------------------------------|----|
| 1. General Methods .....                                                     | S2 |
| 2. General Procedure for Double Carboxylation reactions.....                 | S2 |
| 3. <sup>1</sup> H NMR and <sup>13</sup> C NMR Spectra of New Compounds ..... | S9 |

## 1. General Methods

Unless otherwise stated, all manipulations were performed using standard Schlenk techniques under a dry nitrogen or carbon dioxide atmosphere. DMF, DMAc and DMSO were distilled from CaH<sub>2</sub> at 60 °C under reduced pressure and stored over 4A molecular sieves. Column chromatography was performed on silica gel (200-300 mesh). Thin layer chromatography was performed on 0.20 mm GF254 plates. Visualization was accomplished with UV light (254 nm), cerium ammonium molybdate, and potassium permanganate.

NMR spectra were recorded on Bruker AvanceII 400M or Bruker AvanceIII 500M type (<sup>1</sup>H NMR, 400 MHz or 500MHz; <sup>13</sup>C NMR, 100 MHz or 126 MHz) spectrometer in CDCl<sub>3</sub> at ambient temperature and chemical shifts are expressed in parts per million (δ, ppm). Proton chemical shifts are referenced to 7.26 ppm (CHCl<sub>3</sub>) and carbon chemical shifts are referenced to 77.0 ppm (CDCl<sub>3</sub>). Data reporting uses the following abbreviations: s, singlet; d, doublet; t, triplet; m, multiplet; hept, heptet, and *J*, coupling constant in Hz. High resolution mass spectra (HRMS) were recorded on a Q-TOF mass spectrometry (Micromass, Wythenshawe, UK) equipped with Z-spray ionization source. Infrared spectra (IR) were measured using a Nicolet NEXUS FT-IR spectrophotometer.

Unless otherwise indicated, commercially available starting materials were purchased from Energy Chemical. *o*-Alkynyl acetophenones<sup>1</sup> were synthesized according to literature procedures.

## 2. General Procedure for Double Carboxylation reactions

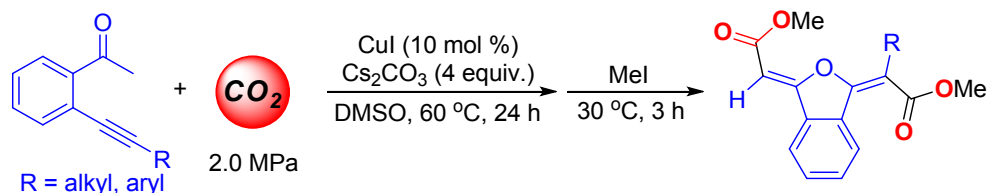

A 20 mL oven dried autoclave containing a stir bar was charged with *o*-alkynyl acetophenone (0.20 mmol), CuI (3.8 mg, 0.02 mmol), cesium carbonate (261 mg, 0.80 mmol) and 2.0 mL dry DMSO in a glove box. After removal from the glove box, the autoclave was purged with carbon dioxide three times and then pressurized to appropriate pressure with carbon dioxide. The reaction mixture was stirred at 60 °C for 24 h. Then the autoclave was cooled to room temperature and the remaining carbon dioxide was vented slowly. MeI (1.0 mmol) was added into the autoclave and the reaction mixture was stirred at 30

<sup>1</sup> (a) Dell'Acqua, M.; Abbiati, G.; Arcadi, A.; Rossi, E. *Org. Biomol. Chem.* **2011**, *9*, 7836. (b) Chernyak, N.; Gorelsky, S. I.; Gevorgyan, V. *Angew. Chem., Int. Ed.* **2011**, *50*, 2342.

°C for 3 h. The reaction mixture was diluted with water (30 mL) and extracted with ethyl acetate (3 × 30 mL). The combined organic layers were washed with water and brine, dried over Na<sub>2</sub>SO<sub>4</sub> and filtered. The solvent was removed under vacuum. The product was isolated by column chromatography on silica gel (ethyl acetate–petroleum ether: 1 : 10).

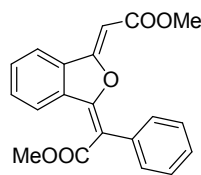

**Methyl**

**(E)-2-[(Z)-3-(1-methoxycarbonylmethylidene)-1(3H)-**

**isobenzofuranylidene]-2-phenylacetate (2a).** <sup>1</sup>H NMR (500 MHz, CDCl<sub>3</sub>) δ 8.11 (d, *J* = 7.9 Hz, 1H), 7.71-7.66 (m, 3H), 7.60-7.52 (m, 2H), 7.47-7.44 (m, 2H), 7.38-7.35 (m, 1H), 5.68 (s, 1H), 3.93 (s, 3H), 3.72 (s, 3H). <sup>13</sup>C NMR (126 MHz, CDCl<sub>3</sub>) δ 168.11, 165.47, 159.98, 154.28, 134.17, 133.49, 132.32, 131.84, 130.80, 129.60, 128.16, 128.01, 124.85, 121.14, 112.79, 90.07, 52.61, 51.40. **IR** (neat, cm<sup>-1</sup>) ν 2955, 2921, 2851, 1717, 1697, 1659, 1630, 1460, 1434, 1264, 1226, 1156, 1063, 1023, 875, 805, 760, 694. **HRMS** (ESI, *m/z*) calcd for C<sub>20</sub>H<sub>17</sub>O<sub>5</sub> [M+H]<sup>+</sup>: 337.1076, found: 337.1058.

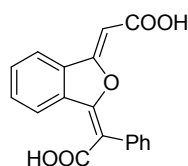

**(E)-2-[(Z)-3-(1-hydroxycarbonylmethylidene)-1(3H)-isobenzofuranylidene]-2-**

**phenylacetic acid (2a').** <sup>1</sup>H NMR (400 MHz, CDCl<sub>3</sub>) δ 8.12 (d, *J* = 7.7 Hz, 1H), 7.90 (d, *J* = 7.9 Hz, 3H), 7.74-7.63 (m, 2H), 7.46-7.34 (m, 3H), 6.01 (s, 1H). <sup>13</sup>C NMR (100 MHz, CDCl<sub>3</sub>) δ 173.65, 170.86, 164.70, 154.86, 138.15, 137.79, 137.39, 136.86, 136.08, 133.95, 133.64, 133.17, 128.16, 127.49, 118.36, 96.11. **IR** (neat, cm<sup>-1</sup>) ν 2956, 2922, 2852, 2662, 2634, 1462, 1377, 1263, 1190, 1091, 1029, 761, 692. **HRMS** (ESI, *m/z*) calcd for C<sub>18</sub>H<sub>11</sub>O<sub>5</sub> [M-H]<sup>-</sup>: 307.0606, found: 307.0614.

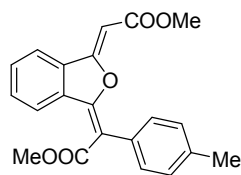

**Methyl**

**(E)-2-[(Z)-3-(1-methoxycarbonylmethylidene)-1(3H)-**

**isobenzofuranylidene]-2-(4-methylphenyl)acetate (2b).** <sup>1</sup>H NMR (400 MHz, CDCl<sub>3</sub>) δ 8.00 (d, *J* = 7.9 Hz, 1H), 7.68-7.51 (m, 5H), 7.29-7.27 (m, 2H), 5.69 (s, 1H), 3.94 (s, 3H), 3.76 (s, 3H), 2.41 (s, 3H). <sup>13</sup>C NMR (100 MHz, CDCl<sub>3</sub>) δ 168.36, 165.54, 160.21, 153.20, 138.09, 133.90, 132.45, 131.81, 130.57, 129.38, 128.98, 124.37, 121.17, 112.85, 89.72, 52.68, 51.45, 21.35. **IR** (neat, cm<sup>-1</sup>) ν 2956, 1717, 1698, 1659, 1623, 1459, 1434, 1268, 1226, 1155, 1066, 874, 838, 763. **HRMS** (ESI, *m/z*) calcd for C<sub>21</sub>H<sub>19</sub>O<sub>5</sub> [M+H]<sup>+</sup>: 351.1232, found: 351.1229.

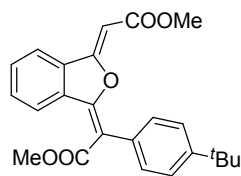

**Methyl (E)-2-[(Z)-3-(1-methoxycarbonylmethylidene)-1(3H)-isobenzofuranylidene]-2-(4-*tert*-butylphenyl)acetate (2c).**  $^1\text{H NMR}$  (400 MHz,  $\text{CDCl}_3$ )  $\delta$  7.94 (d,  $J = 7.8$  Hz, 1H), 7.72-7.66 (m, 3H), 7.57-7.48 (m, 4H), 5.69 (s, 1H), 3.96 (s, 3H), 3.77 (s, 3H), 1.36 (s, 9H).  $^{13}\text{C NMR}$  (126 MHz,  $\text{CDCl}_3$ )  $\delta$  168.39, 165.64, 160.25, 152.82, 151.16, 133.79, 132.52, 131.81, 130.51, 130.20, 129.11, 125.25, 124.16, 121.20, 112.79, 89.71, 52.69, 51.44, 34.71, 31.28. **IR** (neat,  $\text{cm}^{-1}$ )  $\nu$  2954, 2924, 2854, 1697, 1661, 1625, 1459, 1434, 1266, 1228, 1155, 1067, 873, 818, 761. **HRMS** (ESI,  $m/z$ ) calcd for  $\text{C}_{24}\text{H}_{25}\text{O}_5$   $[\text{M}+\text{H}]^+$ : 393.1702, found: 393.1700.

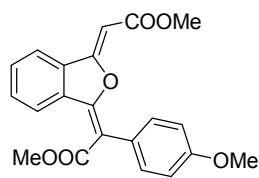

**Methyl (E)-2-[(Z)-3-(1-methoxycarbonylmethylidene)-1(3H)-isobenzofuranylidene]-2-(4-methoxyphenyl)acetate (2d).**  $^1\text{H NMR}$  (400 MHz,  $\text{CDCl}_3$ )  $\delta$  7.92 (d,  $J = 7.9$  Hz, 1H), 7.72 (d,  $J = 8.8$  Hz, 2H), 7.67 (d,  $J = 7.6$  Hz, 1H), 7.58-7.49 (m, 2H), 7.00 (d,  $J = 8.8$  Hz, 2H), 5.69 (s, 1H), 3.96 (s, 3H), 3.87 (s, 3H), 3.78 (s, 3H).  $^{13}\text{C NMR}$  (126 MHz,  $\text{CDCl}_3$ )  $\delta$  168.46, 165.58, 160.39, 159.43, 152.20, 133.65, 132.57, 131.81, 130.84, 130.36, 125.59, 123.98, 121.19, 113.79, 112.61, 89.45, 55.34, 52.71, 51.45. **IR** (neat,  $\text{cm}^{-1}$ )  $\nu$  2924, 2851, 1695, 1658, 1622, 1601, 1512, 1459, 1434, 1258, 1227, 1156, 1066, 873, 834, 801, 762. **HRMS** (ESI,  $m/z$ ) calcd for  $\text{C}_{21}\text{H}_{19}\text{O}_6$   $[\text{M}+\text{H}]^+$ : 367.1182, found: 367.1177.

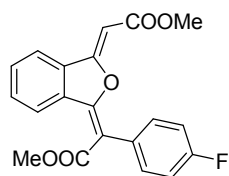

**Methyl (E)-2-[(Z)-3-(1-methoxycarbonylmethylidene)-1(3H)-isobenzofuranylidene]-2-(4-fluorophenyl)acetate (2e).**  $^1\text{H NMR}$  (400 MHz,  $\text{CDCl}_3$ )  $\delta$  8.15 (d,  $J = 7.6$  Hz, 1H), 7.72-7.68 (m, 3H), 7.64-7.55 (m, 2H), 7.18 (t,  $J = 8.7$  Hz, 2H), 5.72 (s, 1H), 3.95 (s, 3H), 3.75 (s, 3H).  $^{13}\text{C NMR}$  (126 MHz,  $\text{CDCl}_3$ )  $\delta$  167.94, 165.36, 163.32, 161.34, 159.93, 154.50, 134.18, 132.16, 131.92, 131.54, 130.94, 124.95, 121.17, 115.28, 115.11, 111.74, 90.14, 52.68, 51.46. **IR** (neat,  $\text{cm}^{-1}$ )  $\nu$  2951, 2923, 2852, 1698, 1663, 1624, 1509, 1434, 1266, 1227, 1157, 1067, 873, 837, 814, 761. **HRMS** (ESI,  $m/z$ ) calcd for  $\text{C}_{20}\text{H}_{16}\text{O}_5\text{F}$   $[\text{M}+\text{H}]^+$ : 355.0982, found: 355.0977.

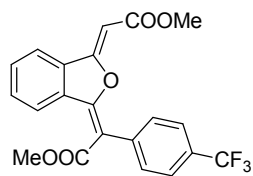

**Methyl (E)-2-[(Z)-3-(1-methoxycarbonylmethylidene)-1(3H)-isobenzofuranylidene]-2-(4-trifluoromethylphenyl)acetate (2f).**  $^1\text{H NMR}$  (400 MHz,  $\text{CDCl}_3$ )  $\delta$  8.28 (d,  $J = 7.6$  Hz, 1H), 7.78 (d,  $J = 8.3$  Hz, 2H), 7.72-7.69 (m, 3H), 7.63-7.57 (m, 2H), 5.72 (s, 1H), 3.91 (s, 3H), 3.68 (s, 3H).  $^{13}\text{C NMR}$  (126 MHz,  $\text{CDCl}_3$ )  $\delta$  167.44, 165.25, 159.49, 156.21, 137.43, 134.50, 132.03, 131.82, 131.43, 130.10, 129.62, 125.59, 125.02, 124.99, 121.19, 111.28, 90.84, 52.72, 51.47. **IR** (neat,  $\text{cm}^{-1}$ )  $\nu$  2955, 2926, 2854, 1709, 1609, 1434, 1326, 1267, 1234, 1167, 1106, 1068, 836, 817, 762, 718. **HRMS** (ESI,  $m/z$ ) calcd for  $\text{C}_{21}\text{H}_{15}\text{O}_5\text{F}_3\text{Na}$   $[\text{M}+\text{Na}]^+$ : 427.0769, found: 427.0758.

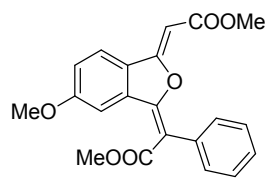

**Methyl (E)-2-[(Z)-3-(1-methoxycarbonylmethylidene)-6-methoxy-1(3H)-isobenzofuranylidene]-2-phenylacetate (2g).**  $^1\text{H NMR}$  (400 MHz,  $\text{CDCl}_3$ )  $\delta$  7.69-7.67 (m, 3H), 7.56 (d,  $J = 8.6$  Hz, 1H), 7.46 (t,  $J = 7.7$  Hz, 2H), 7.37 (t,  $J = 7.4$  Hz, 1H), 7.10 (dd,  $J = 8.6, 2.2$  Hz, 1H), 5.55 (s, 1H), 3.92 (s, 6H), 3.69 (s, 3H).  $^{13}\text{C NMR}$  (126 MHz,  $\text{CDCl}_3$ )  $\delta$  167.10, 164.68, 161.72, 158.94, 153.43, 133.10, 132.54, 128.59, 127.11, 126.96, 126.04, 121.32, 118.27, 111.80, 107.07, 87.54, 54.72, 51.58, 50.29. **IR** (neat,  $\text{cm}^{-1}$ )  $\nu$  3057, 1950, 2926, 2842, 1715, 1659, 1612, 1488, 1435, 1326, 1266, 1237, 1152, 1084, 1061, 835, 813, 766, 732, 692. **HRMS** (ESI,  $m/z$ ) calcd for  $\text{C}_{21}\text{H}_{18}\text{O}_6\text{Na}$   $[\text{M}+\text{Na}]^+$ : 389.1001, found: 389.1013.

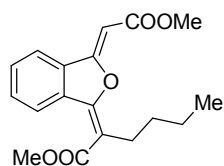

**Methyl (E)-2-[(Z)-3-(1-methoxycarbonylmethylidene)-1(3H)-isobenzofuranylidene]caproate (2h).**  $^1\text{H NMR}$  (400 MHz,  $\text{CDCl}_3$ )  $\delta$  8.58 (d,  $J = 8.0$  Hz, 1H), 7.64 (d,  $J = 7.5$  Hz, 1H), 7.58-7.48 (m, 2H), 5.68 (s, 1H), 3.88 (s, 3H), 3.81 (s, 3H), 2.81 (t,  $J = 7.4$  Hz, 2H), 1.62-1.54 (m, 2H), 1.46-1.41 (m, 2H), 0.96 (t,  $J = 7.3$  Hz, 3H).  $^{13}\text{C NMR}$  (100 MHz,  $\text{CDCl}_3$ )  $\delta$  167.18, 164.65, 159.21, 157.14, 133.95, 130.96, 130.77, 129.55, 125.52, 119.75, 112.87, 88.05, 50.86, 50.34, 30.19, 27.61, 21.62, 12.93. **IR** (neat,  $\text{cm}^{-1}$ )  $\nu$  2953, 2860, 1708, 1664, 1614, 1455, 1435, 1251, 1154, 1095, 1058, 815, 764. **HRMS** (ESI,  $m/z$ ) calcd for  $\text{C}_{18}\text{H}_{20}\text{O}_5\text{Na}$   $[\text{M}+\text{Na}]^+$ : 339.1208, found: 339.1216.

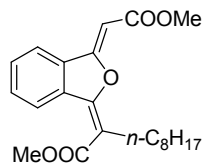

**Methyl (E)-2-[(Z)-3-(1-methoxycarbonylmethylidene)-1(3H)-isobenzofuranylidene]caprate (2i).**  $^1\text{H NMR}$  (400 MHz,  $\text{CDCl}_3$ )  $\delta$  8.57 (d,  $J = 7.9$  Hz, 1H), 7.64 (d,  $J = 7.6$  Hz, 1H), 7.57-7.48 (m, 2H), 5.68 (s, 1H), 3.87 (s, 3H), 3.81 (s, 3H), 2.79 (t,  $J = 7.6$  Hz, 2H), 1.33-1.22 (m, 12H), 0.86 (t,  $J = 7.4$  Hz, 3H).  $^{13}\text{C NMR}$  (126 MHz,  $\text{CDCl}_3$ )  $\delta$  168.20, 165.66, 160.23, 158.11, 134.96, 131.98, 131.78, 130.56, 126.53, 120.77, 113.93, 89.05, 51.87, 51.35, 31.89, 30.91, 29.50, 29.07, 28.88, 22.67, 14.09. **IR** (neat,  $\text{cm}^{-1}$ )  $\nu$  2960, 2925, 2852, 1712, 1665, 1614, 1455, 1434, 1261, 1155, 1099, 1066, 1020, 872, 800, 767, 700. **HRMS** (ESI,  $m/z$ ) calcd for  $\text{C}_{22}\text{H}_{28}\text{O}_5\text{Na}$   $[\text{M}+\text{Na}]^+$ : 395.1834, found: 395.1845.

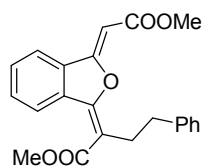

**Methyl (E)-2-[(Z)-3-(1-methoxycarbonylmethylidene)-1(3H)-isobenzofuranylidene]-4-phenylbutyrate (2j).**  $^1\text{H NMR}$  (400 MHz,  $\text{CDCl}_3$ )  $\delta$  8.62 (d,  $J = 7.9$  Hz, 1H), 7.59 (d,  $J = 7.6$  Hz, 1H), 7.53-7.44 (m, 2H), 7.30-7.18 (m, 4H), 7.12 (t,  $J = 7.3$  Hz, 1H), 5.64 (s, 1H), 3.77 (s, 3H), 3.76 (s, 3H), 3.05-3.01 (m, 2H), 2.88-2.82 (m, 2H).  $^{13}\text{C NMR}$  (126 MHz,  $\text{CDCl}_3$ )  $\delta$  166.84, 164.51, 158.92, 158.09, 140.71, 134.05, 130.82, 129.78, 127.68, 127.17, 125.93, 124.86, 119.74, 111.64, 88.47, 50.86, 50.42, 34.43, 30.06. **IR** (neat,  $\text{cm}^{-1}$ )  $\nu$  3026, 2949, 2859, 1711, 1666, 1614, 1454, 1435, 1313, 1250, 1191, 1149, 1084, 1063, 1021, 817, 765, 702, 655. **HRMS** (ESI,  $m/z$ ) calcd for  $\text{C}_{22}\text{H}_{20}\text{O}_5\text{Na}$   $[\text{M}+\text{Na}]^+$ : 387.1208, found: 387.1216.

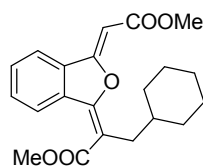

**Methyl (E)-2-[(Z)-3-(1-methoxycarbonylmethylidene)-1(3H)-isobenzofuranylidene]-3-cyclohexylpropionate (2k).**  $^1\text{H NMR}$  (400 MHz,  $\text{CDCl}_3$ )  $\delta$  8.55 (d,  $J = 8.0$  Hz, 1H), 7.64 (d,  $J = 7.6$  Hz, 1H), 7.58-7.46 (m, 2H), 5.67 (s, 1H), 3.88 (s, 3H), 3.83 (s, 3H), 2.73 (d,  $J = 7.0$  Hz, 2H), 1.76-1.61 (m, 5H), 1.33-1.06 (m, 6H).  $^{13}\text{C NMR}$  (126 MHz,  $\text{CDCl}_3$ )  $\delta$  168.42, 165.70, 160.06, 158.34, 134.98, 131.91, 131.75, 130.55, 126.47, 120.79, 112.75, 89.09, 51.88, 51.36, 38.22, 36.22, 33.12, 26.48, 26.34. **IR** (neat,  $\text{cm}^{-1}$ )  $\nu$  2923, 2850, 1708, 1664, 1612, 1473, 1448, 1305, 1247, 1169, 1156, 1104, 1077, 1060, 815, 762. **HRMS** (ESI,  $m/z$ ) calcd for  $\text{C}_{21}\text{H}_{25}\text{O}_5$   $[\text{M}+\text{H}]^+$ : 357.1702, found: 357.1682.

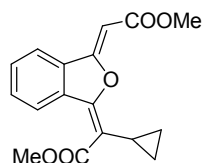

**Methyl (E)-2-[(Z)-3-(1-methoxycarbonylmethylidene)-1(3H)-isobenzofuranylidene]-2-cyclopropylacetate (2l).**  $^1\text{H NMR}$  (400 MHz,  $\text{CDCl}_3$ )  $\delta$  7.90 (d,  $J = 7.9$  Hz, 1H), 7.66-7.64 (m, 1H), 7.55-7.46 (m, 2H), 5.69 (s, 1H), 3.90 (s, 3H), 3.83 (s, 3H), 2.22-2.18 (m, 1H), 1.04-0.91 (m, 4H).  $^{13}\text{C NMR}$  (126 MHz,  $\text{CDCl}_3$ )  $\delta$  166.54, 164.70, 159.90, 154.15, 132.80, 131.08, 130.69, 129.01, 123.00, 119.97, 113.65, 87.45, 51.08, 50.27, 9.82, 6.26. **IR** (neat,  $\text{cm}^{-1}$ )  $\nu$  3083, 3005, 2949, 2849, 1715, 1664, 1636, 1434, 1354, 1266, 1154, 1068, 1018, 815, 763, 717. **HRMS** (ESI,  $m/z$ ) calcd for  $\text{C}_{17}\text{H}_{16}\text{O}_5\text{Na}$   $[\text{M}+\text{Na}]^+$ : 323.0895, found: 323.0885.

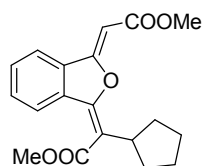

**Methyl (E)-2-[(Z)-3-(1-methoxycarbonylmethylidene)-1(3H)-isobenzofuranylidene]-2-cyclopentylacetate (2m).**  $^1\text{H NMR}$  (400 MHz,  $\text{CDCl}_3$ )  $\delta$  7.80 (d,  $J = 7.7$  Hz, 1H), 7.62 (d,  $J = 7.5$  Hz, 1H), 7.53-7.44 (m, 2H), 5.65 (s, 1H), 3.90 (s, 3H), 3.80 (s, 3H), 2.03-1.67 (m, 9H).  $^{13}\text{C NMR}$  (126 MHz,  $\text{CDCl}_3$ )  $\delta$  168.46, 165.71, 160.87, 153.34, 134.09, 132.19, 131.65, 129.98, 123.71, 120.99, 116.84, 88.25, 51.91, 51.26, 39.33, 31.37, 25.88. **IR** (neat,  $\text{cm}^{-1}$ )  $\nu$  2950, 2870, 1716, 1666, 1639, 1473, 1459, 1434, 1306, 1250, 1154, 1061, 840, 813, 763, 717. **HRMS** (ESI,  $m/z$ ) calcd for  $\text{C}_{19}\text{H}_{20}\text{O}_5\text{Na}$   $[\text{M}+\text{Na}]^+$ : 351.1208, found: 351.1219.

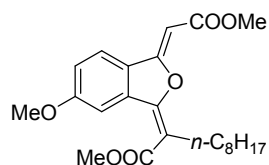

**Methyl (E)-2-[(Z)-3-(1-methoxycarbonylmethylidene)-6-methoxy-1(3H)-isobenzofuranylidene]caprate (2o).**  $^1\text{H NMR}$  (400 MHz,  $\text{CDCl}_3$ )  $\delta$  8.20 (d,  $J = 2.3$  Hz, 1H), 7.53 (d,  $J = 8.6$  Hz, 1H), 7.06 (dd,  $J = 8.6, 2.3$  Hz, 1H), 5.55 (s, 1H), 3.91 (s, 3H), 3.87 (s, 3H), 3.80 (s, 3H), 2.79 (t,  $J = 7.4$  Hz, 2H), 1.63-0.85 (m, 15H).  $^{13}\text{C NMR}$  (126 MHz,  $\text{CDCl}_3$ )  $\delta$  168.21, 165.87, 162.79, 160.27, 158.23, 133.89, 127.82, 121.95, 119.26, 114.06, 109.54, 93.13, 87.54, 55.73, 51.89, 51.24, 31.91, 29.59, 29.44, 29.11, 28.93, 22.68, 14.11. **IR** (neat,  $\text{cm}^{-1}$ )  $\nu$  3138, 2926, 2855, 1707, 1661, 1609, 1485, 1435, 1326, 1264, 1237, 1156, 1122, 1100, 1066, 808, 784, 723. **HRMS** (ESI,  $m/z$ ) calcd for  $\text{C}_{23}\text{H}_{30}\text{O}_6\text{Na}$   $[\text{M}+\text{Na}]^+$ : 425.1940, found: 425.1934.

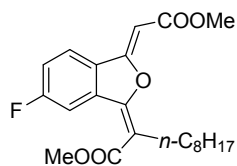

**Methyl (E)-2-[(Z)-3-(1-methoxycarbonylmethylidene)-6-fluoro-1(3H)-isobenzofuranylidene]caprate (2p).**  $^1\text{H NMR}$  (400 MHz,  $\text{CDCl}_3$ )  $\delta$  8.35 (dd,  $J = 10.0, 2.2$  Hz, 1H), 7.57 (dd,  $J = 8.6, 4.9$  Hz, 1H), 7.19 (td,  $J = 8.4, 2.3$  Hz, 1H), 5.59 (s, 1H), 3.86 (s, 3H), 3.79 (s, 3H), 2.76 (t,  $J = 7.4$  Hz, 2H), 1.64-1.48 (m, 2H), 1.42-1.18 (m, 10H), 0.85 (t,  $J = 6.8$  Hz, 3H).  $^{13}\text{C NMR}$  (126 MHz,  $\text{CDCl}_3$ )  $\delta$  166.84, 164.80, 164.44, 162.81, 158.32, 156.37, 132.96, 129.98, 121.44, 117.88, 117.68, 114.02, 112.77, 112.55, 87.97, 50.98, 50.34, 30.86, 28.56, 28.37, 28.28, 27.99, 27.81, 21.64, 13.07. **IR** (neat,  $\text{cm}^{-1}$ )  $\nu$  3123, 2952, 2927, 2855, 1710, 1665, 1615, 1477, 1435, 1358, 1261, 1213, 1153, 1121, 1099, 1066, 809, 635. **HRMS** (ESI,  $m/z$ ) calcd for  $\text{C}_{22}\text{H}_{27}\text{O}_5\text{FNa}$   $[\text{M}+\text{Na}]^+$ : 413.1740, found: 413.1732.

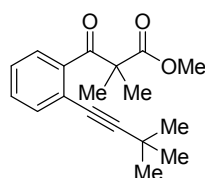

**Methyl 2,2-dimethyl-3-oxo-3-[2-(3,3-dimethylbutynyl)phenyl]propionate (4).**  $^1\text{H NMR}$  (400 MHz,  $\text{CDCl}_3$ )  $\delta$  7.43 (dd,  $J = 7.7, 0.8$  Hz, 1H), 7.30-7.24 (m, 2H), 7.16 (dd,  $J = 7.7, 1.0$  Hz, 1H), 3.70 (s, 3H), 1.51 (s, 6H), 1.29 (s, 9H).  $^{13}\text{C NMR}$  (125 MHz,  $\text{CDCl}_3$ )  $\delta$  203.69, 173.90, 142.13, 132.88, 129.09, 126.85, 124.66, 121.41, 102.44, 56.07, 52.42, 30.68, 28.05, 23.04. **IR** (neat,  $\text{cm}^{-1}$ )  $\nu$  3063, 2970, 2869, 2239, 1743, 1707, 1473, 1441, 1363, 1274, 1146, 964, 950, 841, 795, 758. **HRMS** (ESI,  $m/z$ ) calcd for  $\text{C}_{18}\text{H}_{22}\text{O}_3\text{Na}$   $[\text{M}+\text{Na}]^+$ : 309.1467, found: 309.1479.

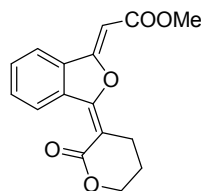

**(E)- $\alpha$ -[(Z)-3-(1-methoxycarbonylmethylidene)-1(3H)-isobenzofuranylidene]- $\delta$ -valerolactone (5).**  $^1\text{H NMR}$  (400 MHz,  $\text{CDCl}_3$ )  $\delta$  8.99 (d,  $J = 7.9$  Hz, 1H), 7.67 (d,  $J = 7.7$  Hz, 1H), 7.64-7.54 (m, 2H), 5.78 (s, 1H), 4.37 (t,  $J = 6.8$  Hz, 2H), 3.82 (s, 3H), 3.10 (t,  $J = 6.9$  Hz, 2H), 2.06-2.03 (m, 2H).  $^{13}\text{C NMR}$  (126 MHz,  $\text{CDCl}_3$ )  $\delta$  165.97, 165.36, 160.63, 160.17, 135.06, 132.26, 131.52, 131.33, 128.11, 120.65, 106.20, 90.07, 68.63, 51.42, 24.65, 22.22. **IR** (neat,  $\text{cm}^{-1}$ )  $\nu$  3125, 3080, 2950, 1701, 1664, 1601, 1473, 1325, 1303, 1272, 1252, 1155, 1093, 1060, 976, 816, 770, 747, 730. **HRMS** (ESI,  $m/z$ ) calcd for  $\text{C}_{16}\text{H}_{14}\text{O}_5\text{Na}$   $[\text{M}+\text{Na}]^+$ : 309.0739, found: 309.0742.



### 3. $^1\text{H}$ NMR and $^{13}\text{C}$ NMR Spectra of New Compounds

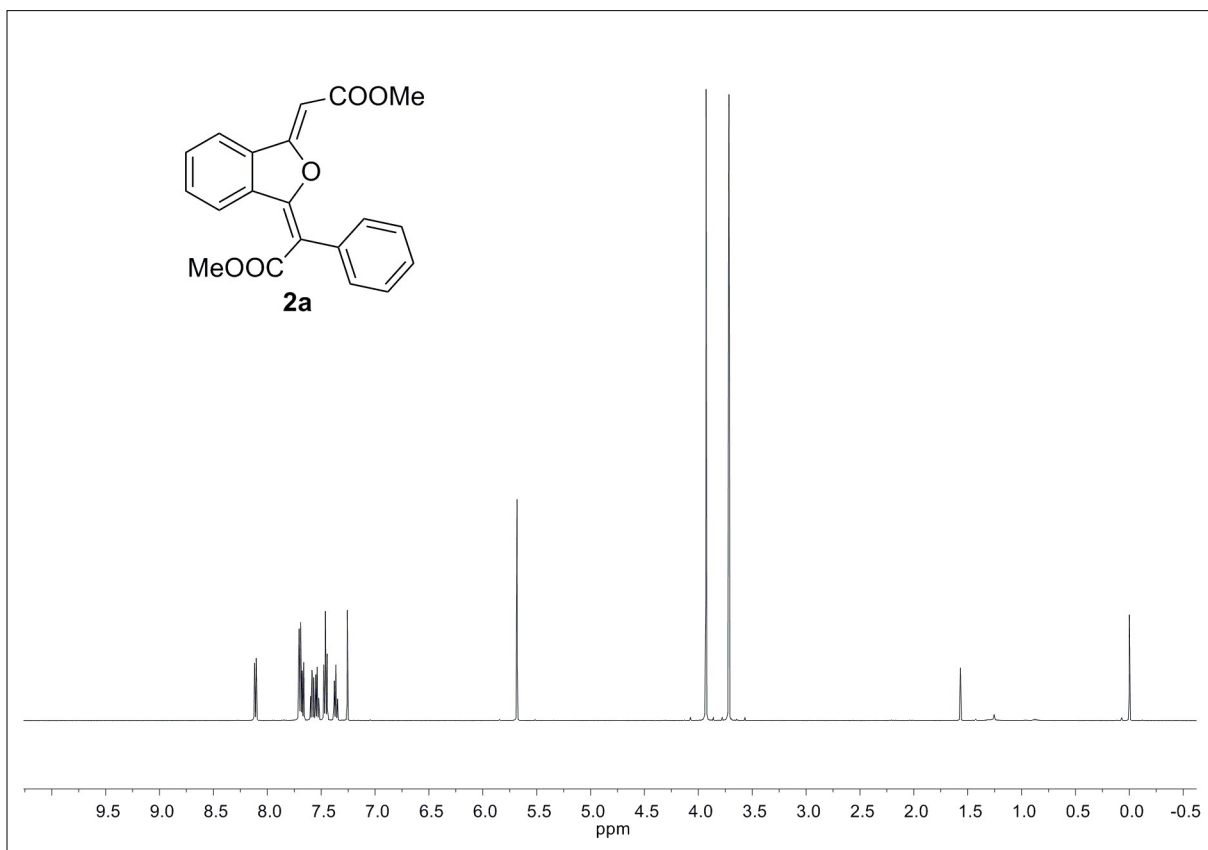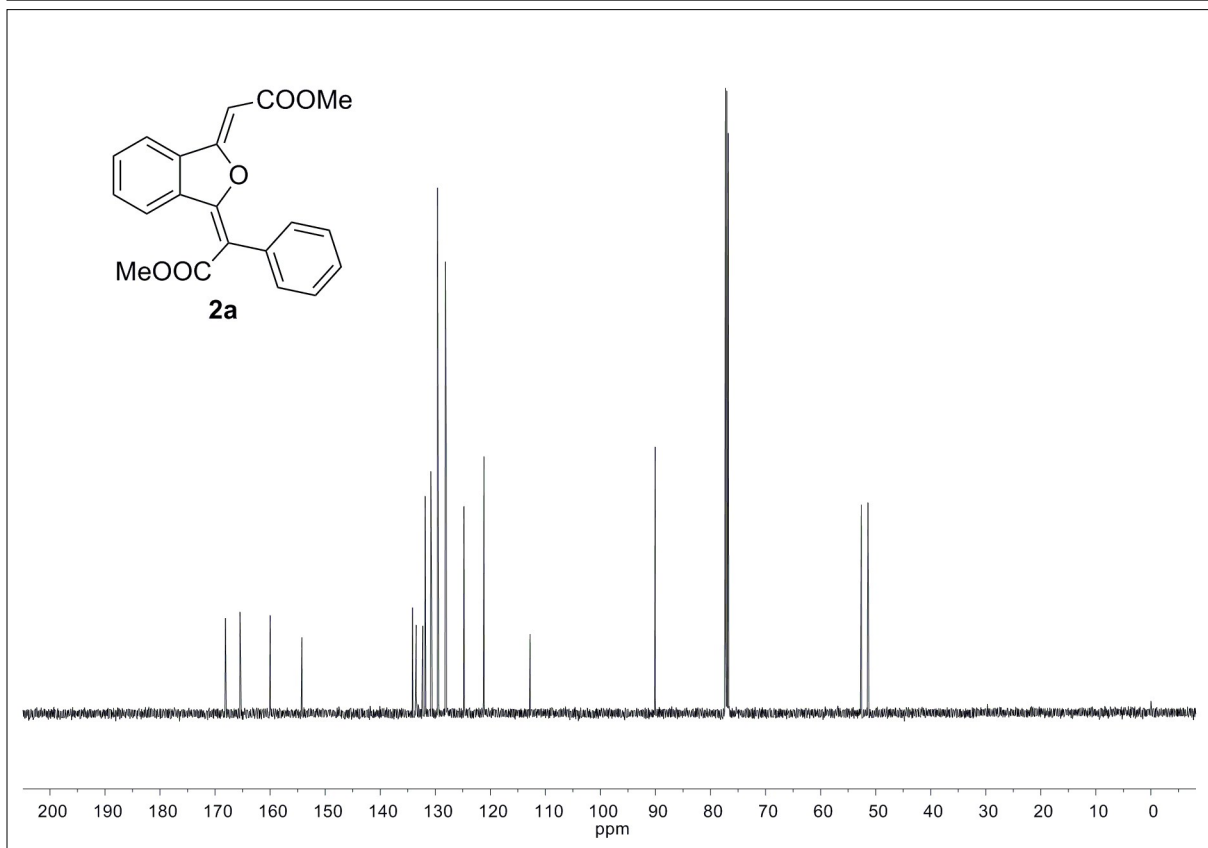

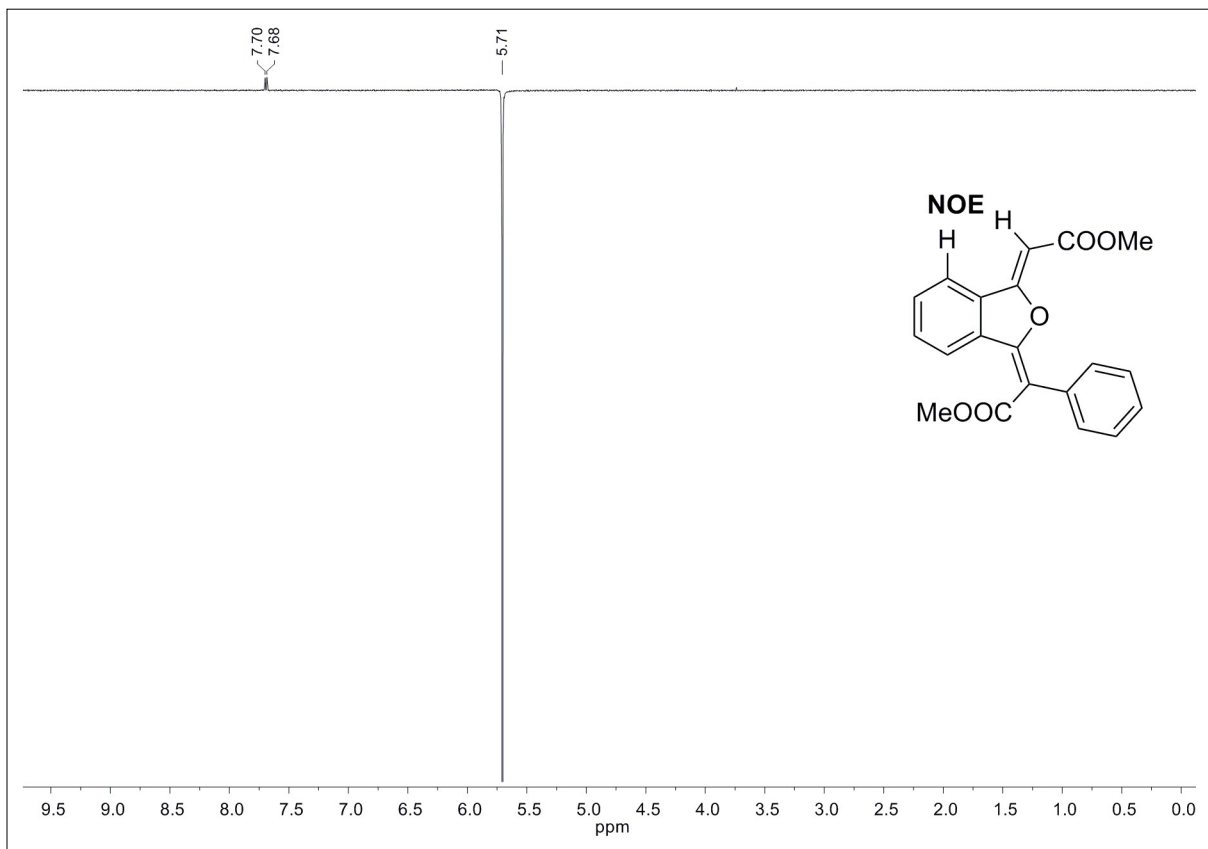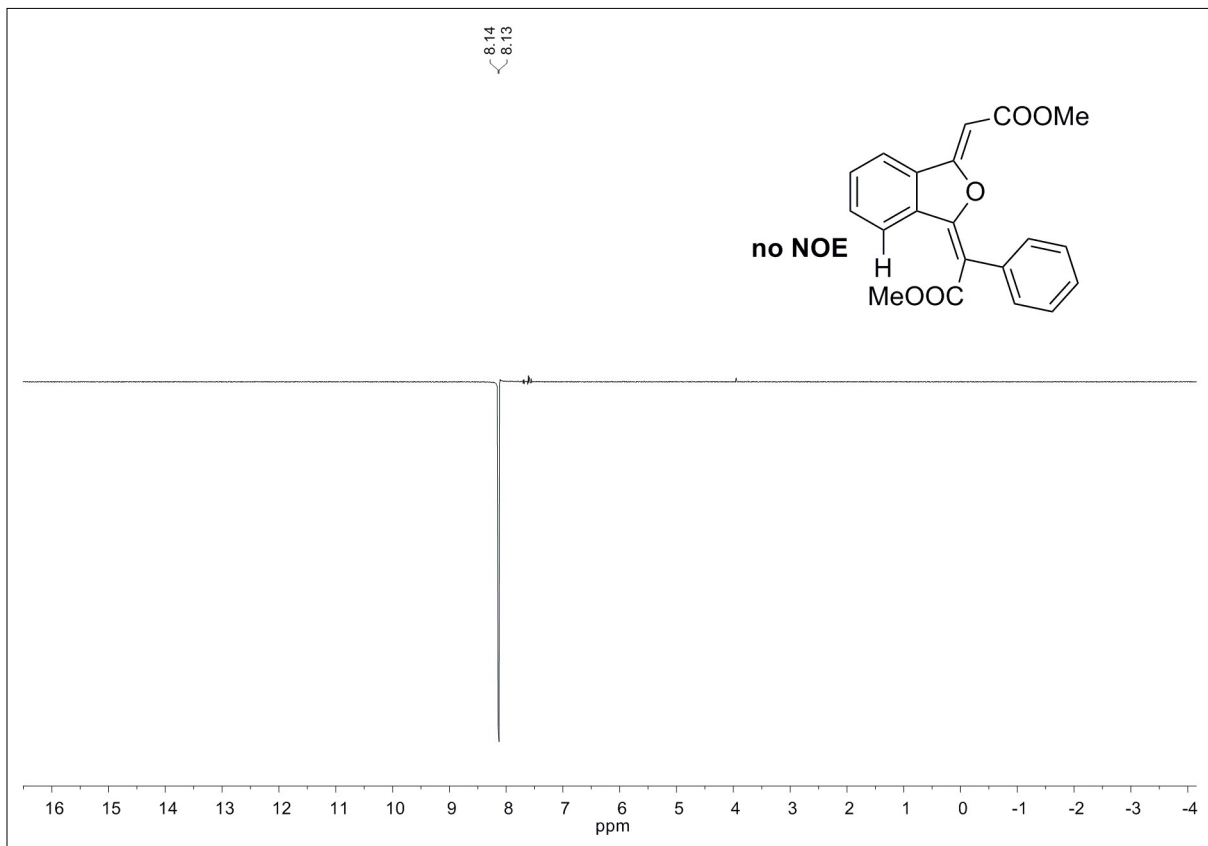

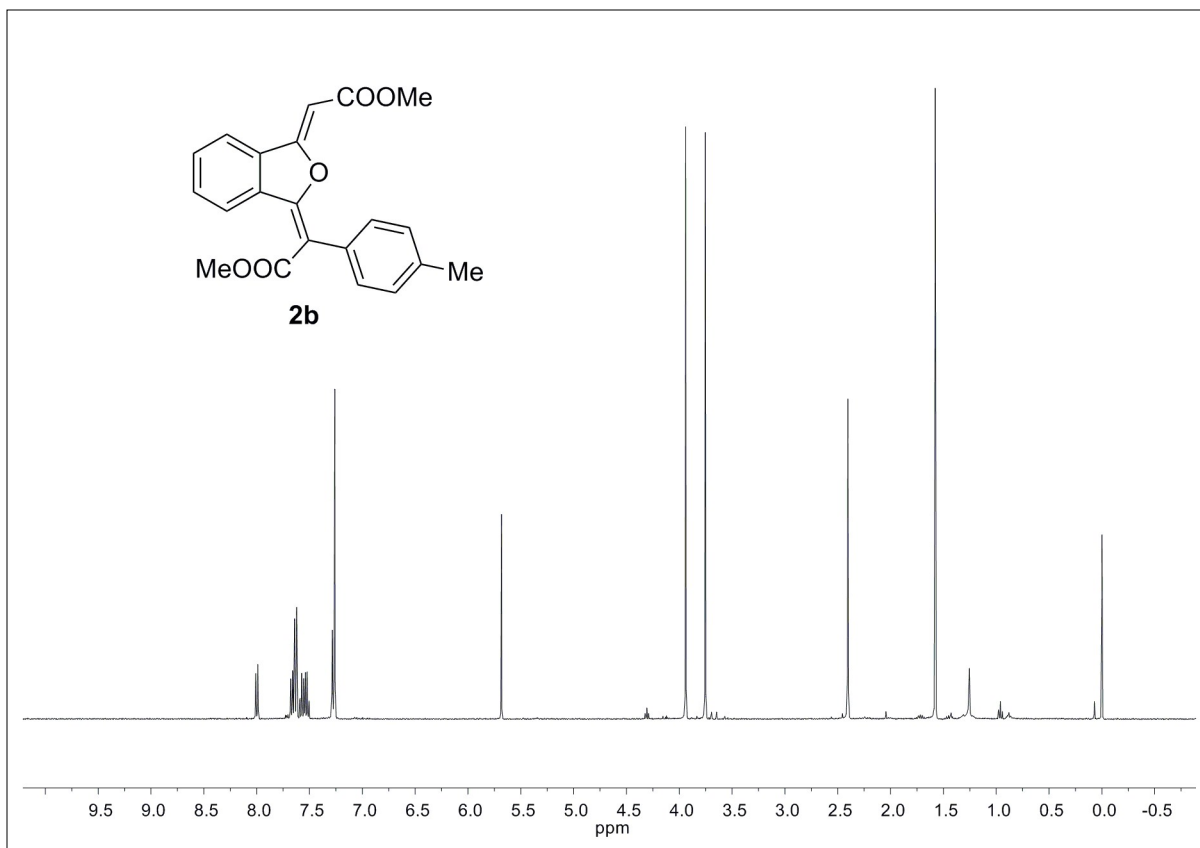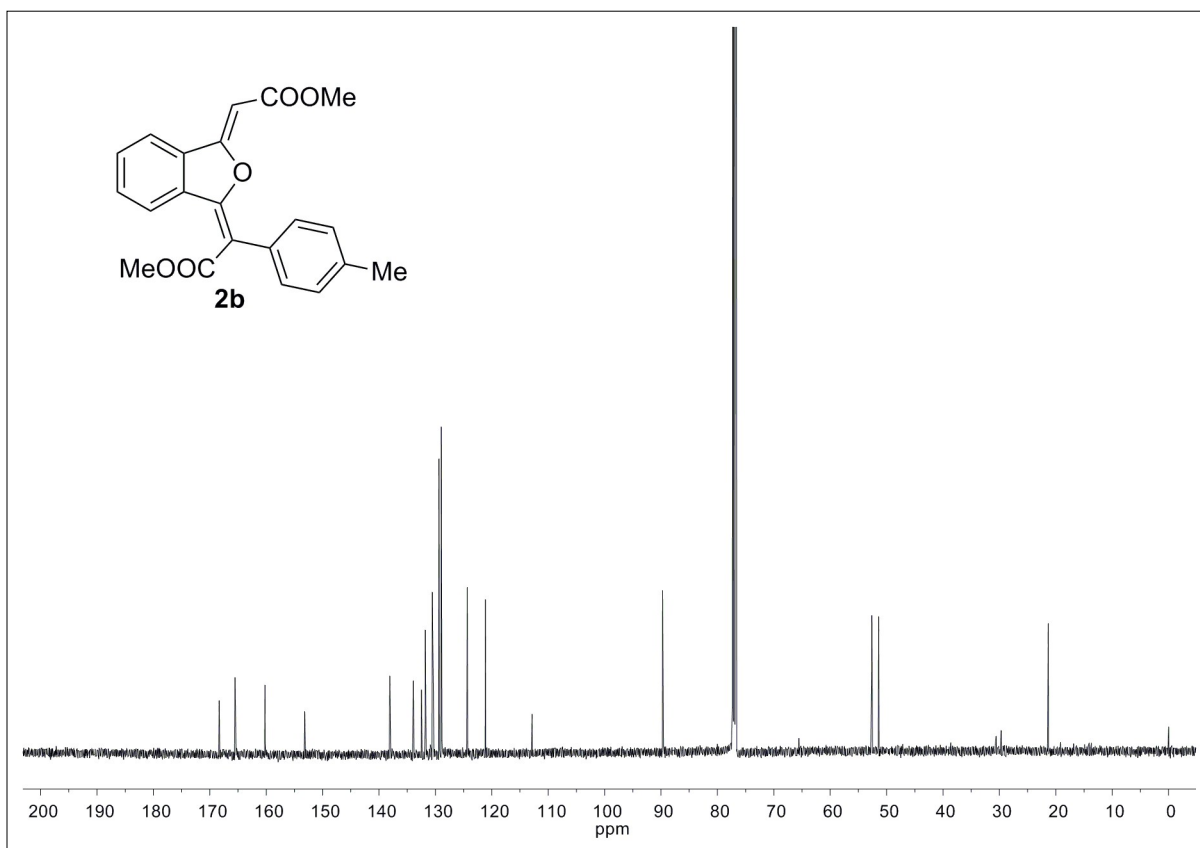

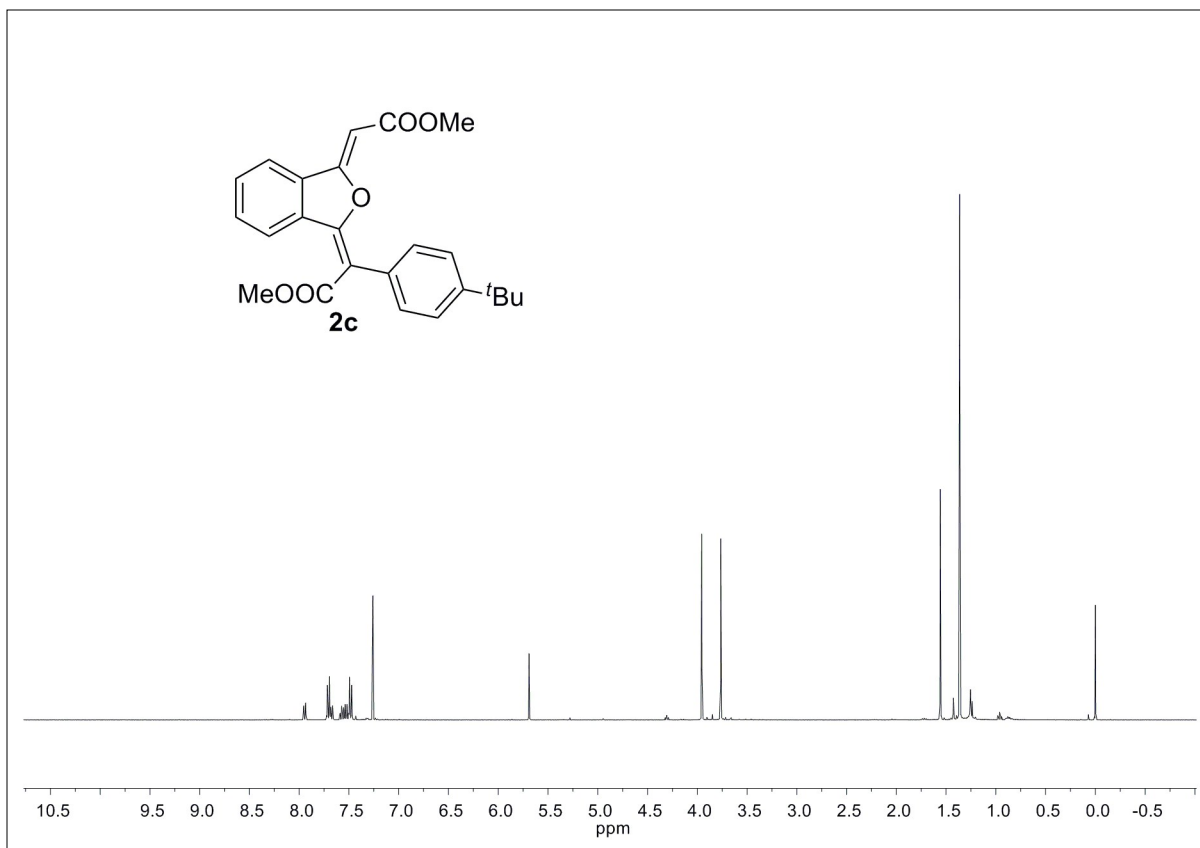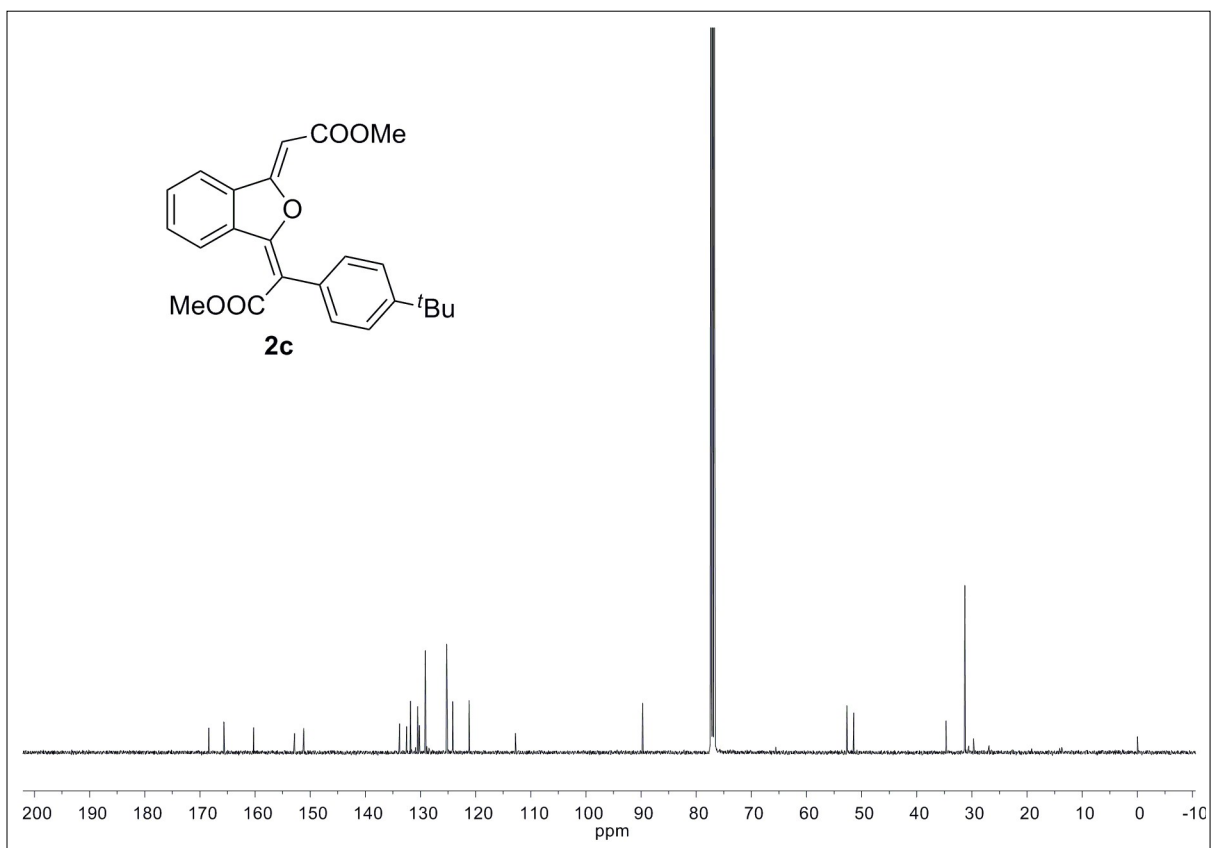

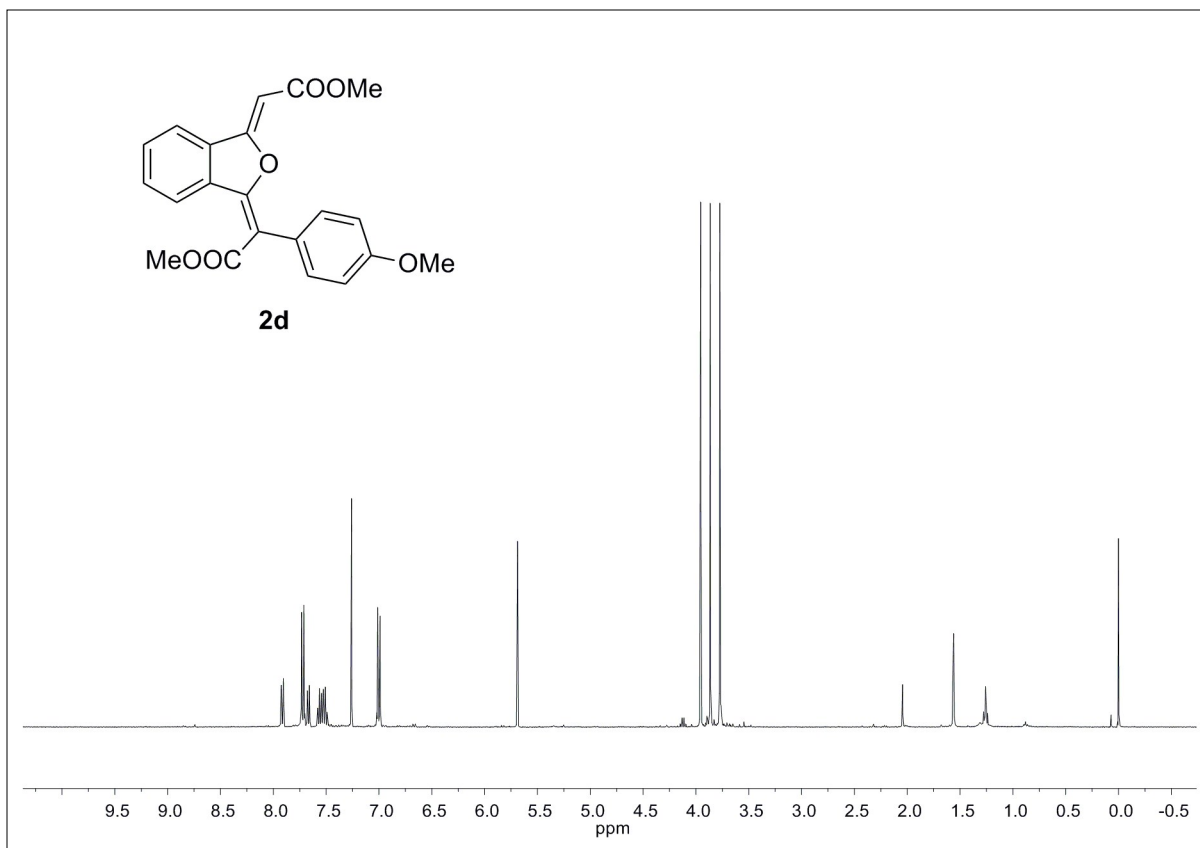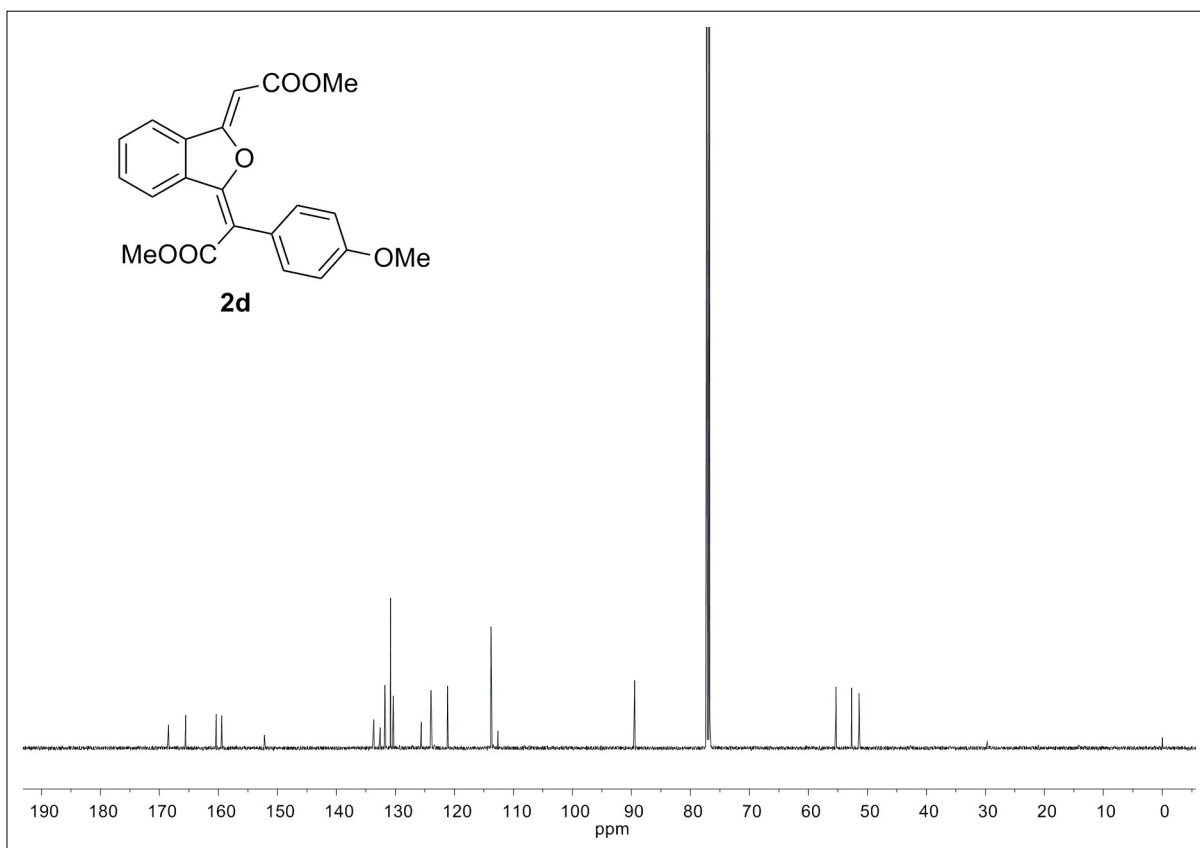

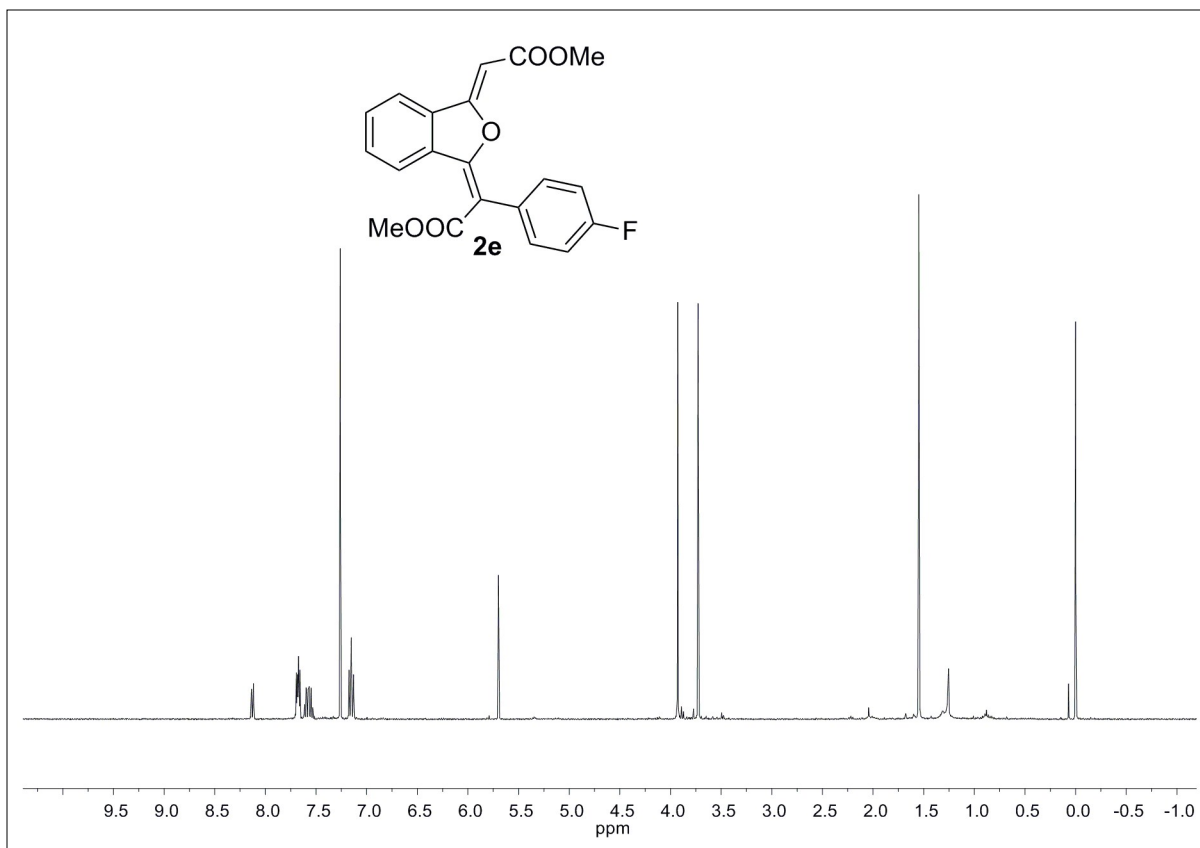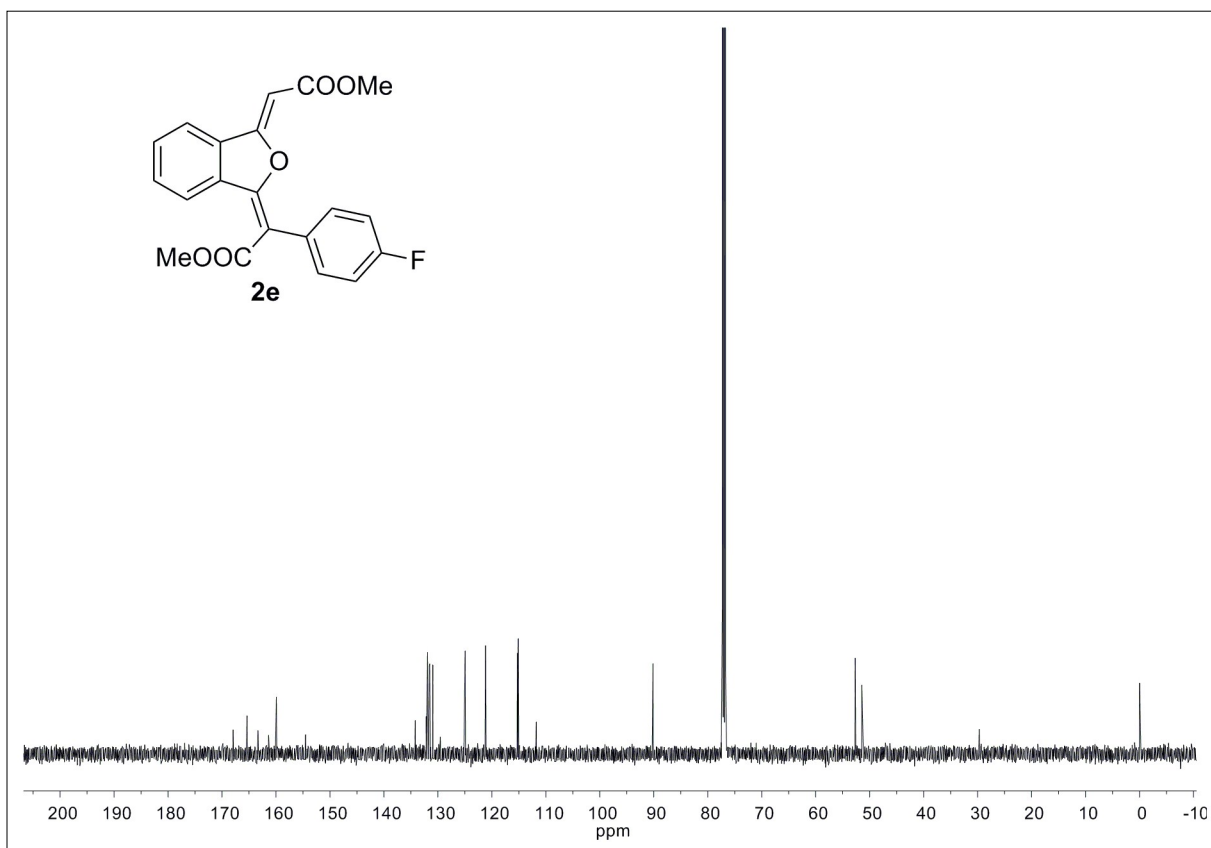

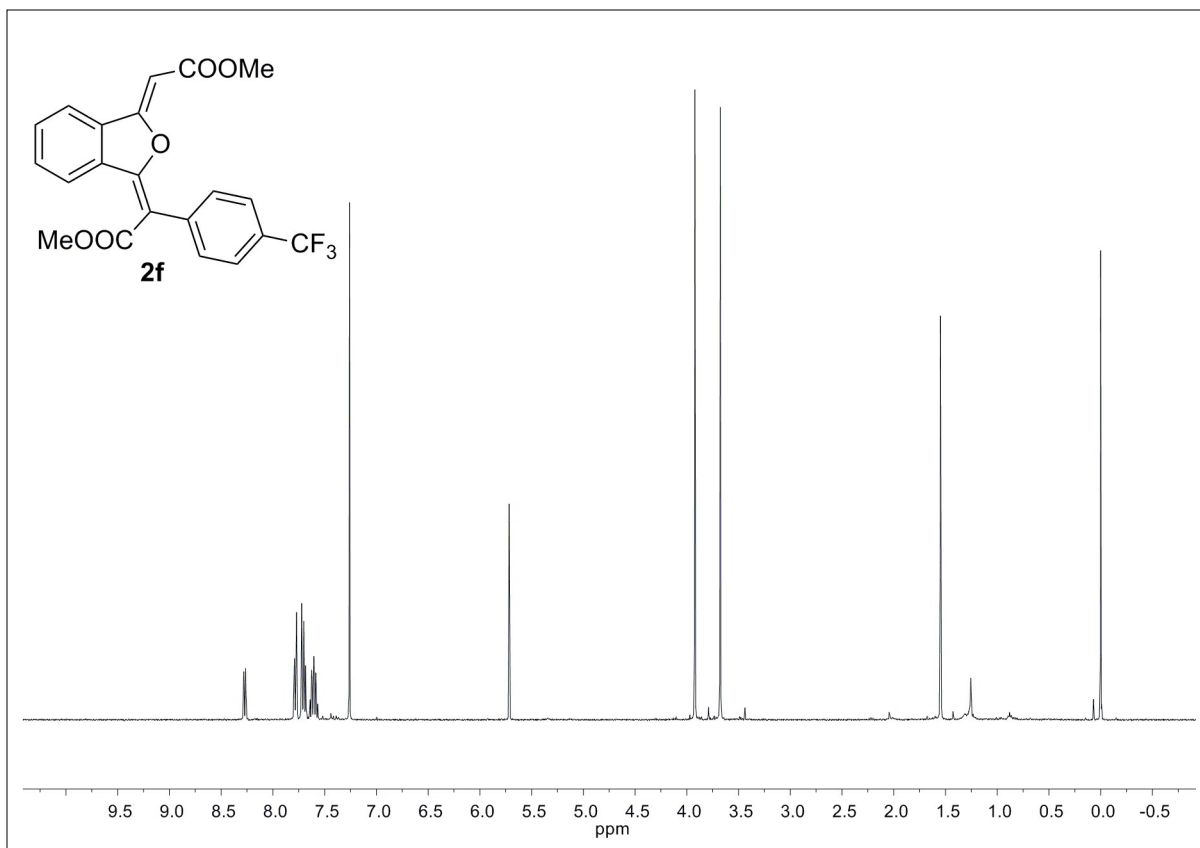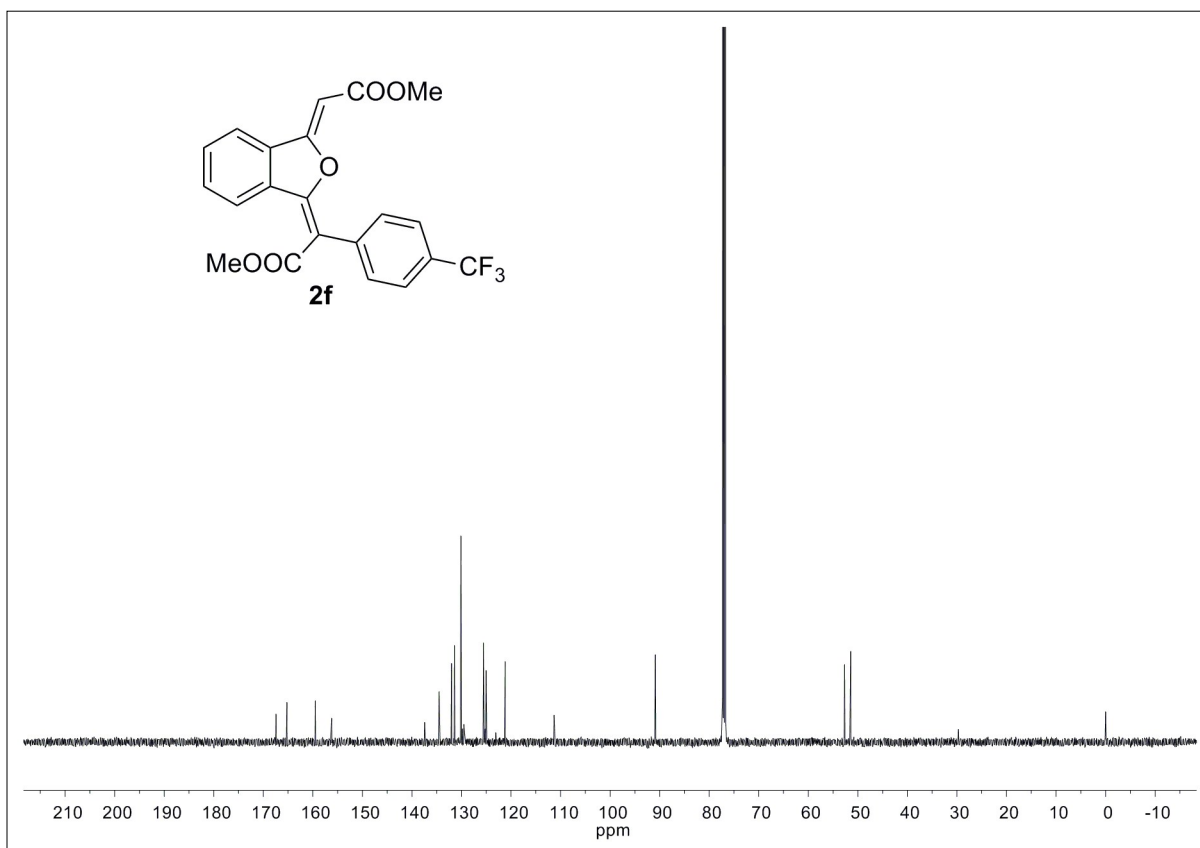

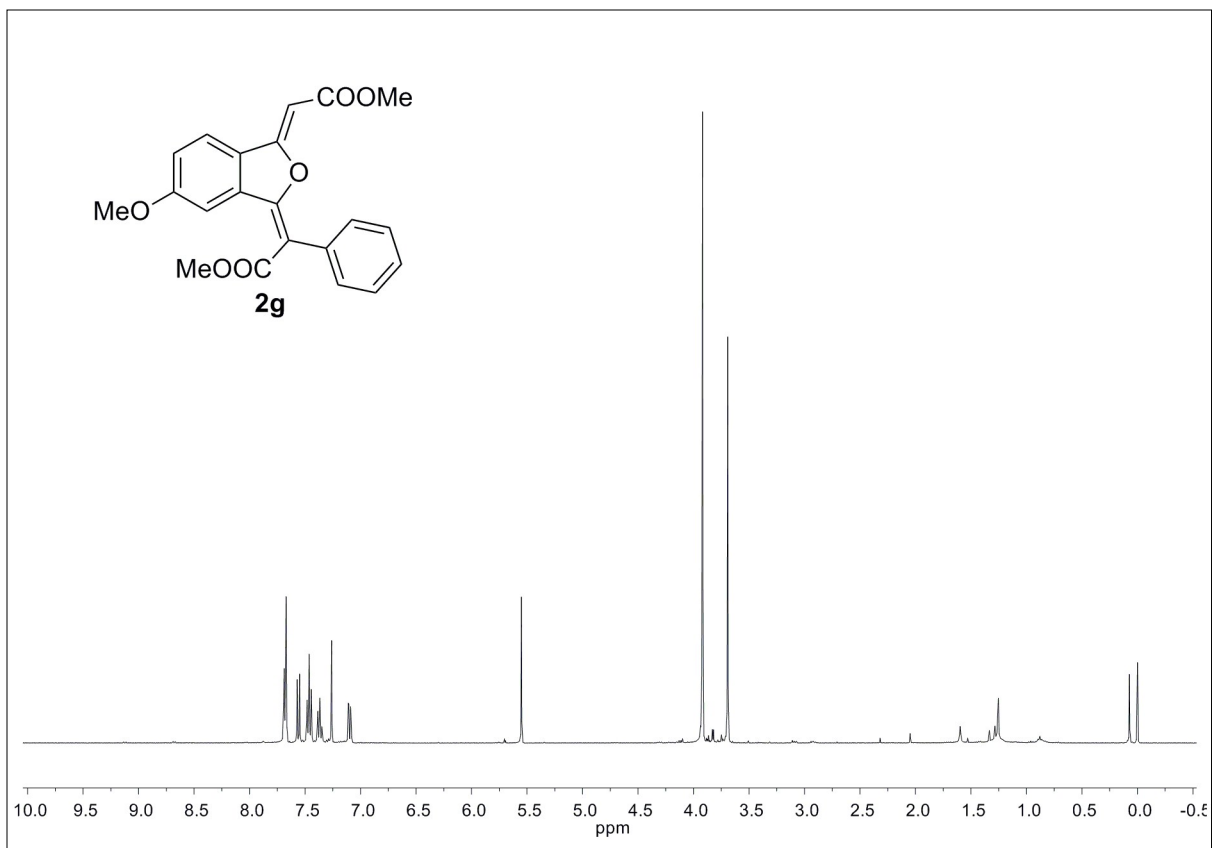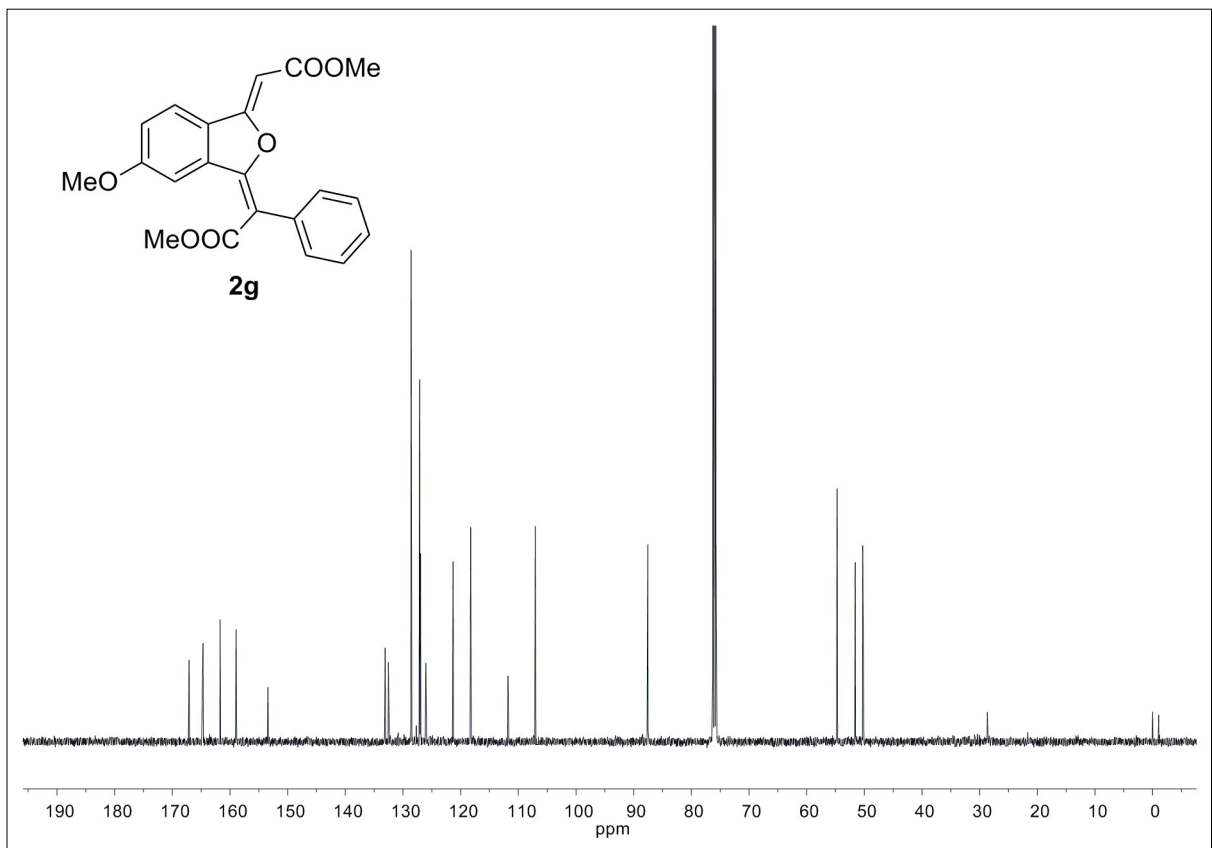



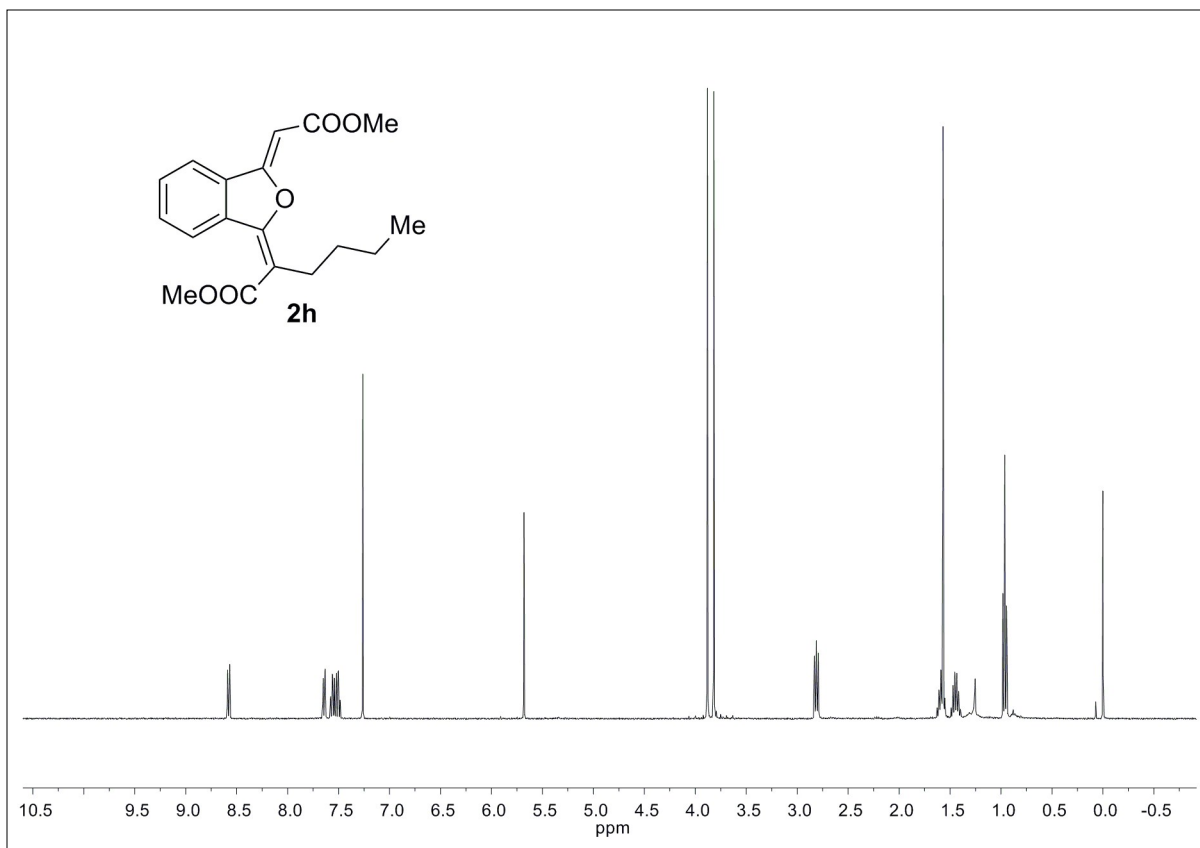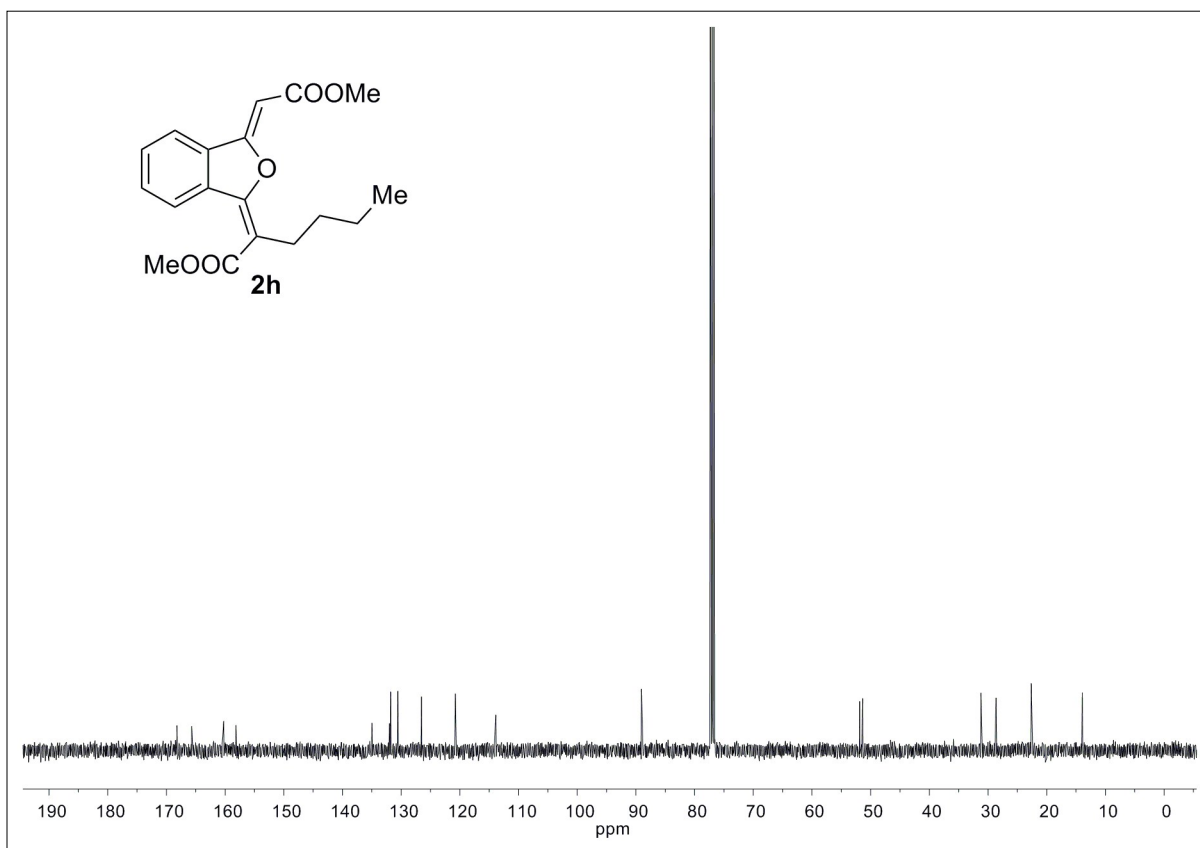

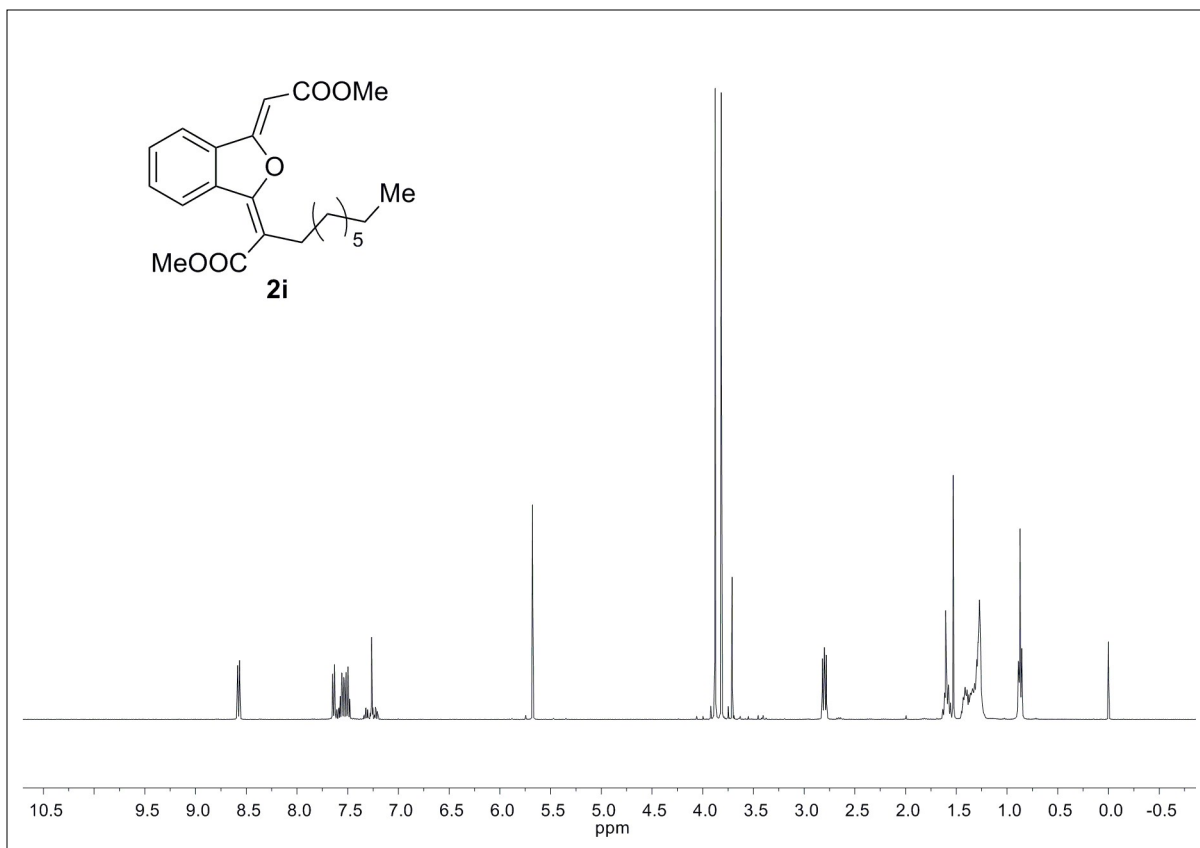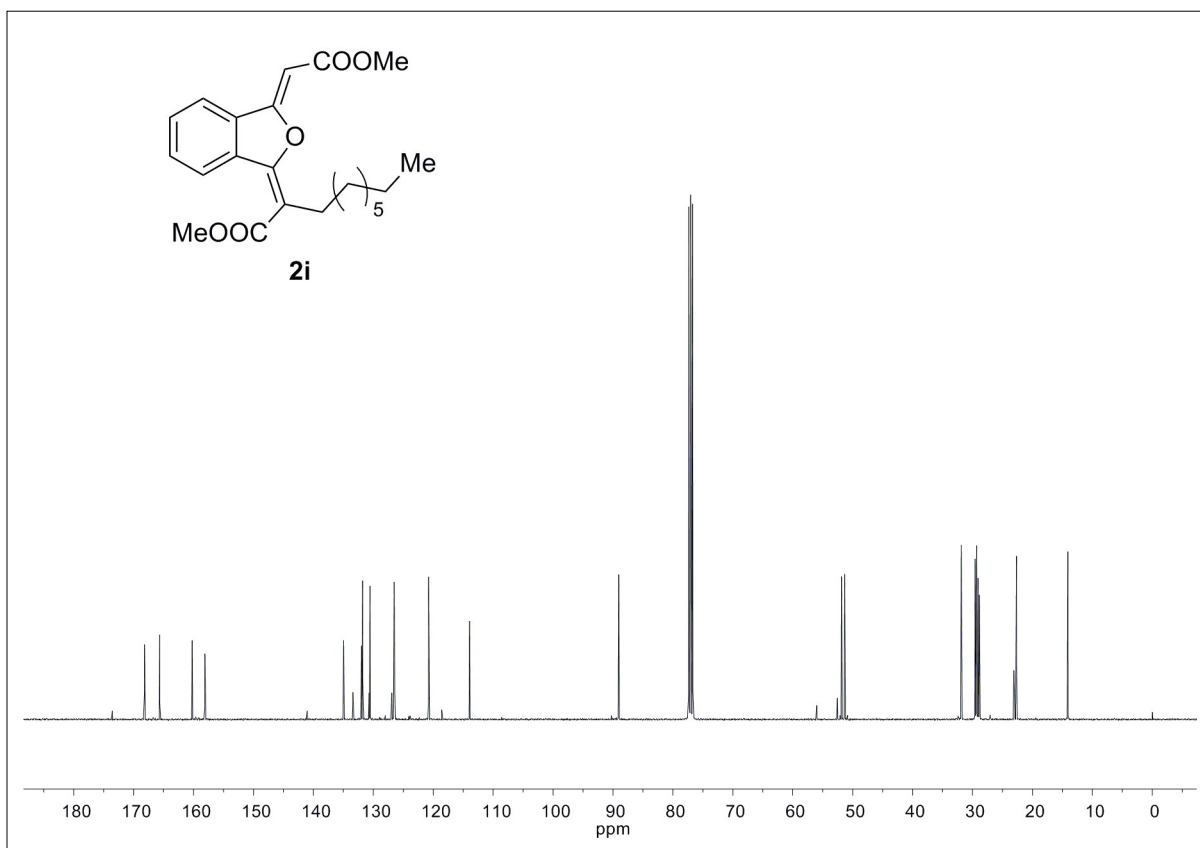

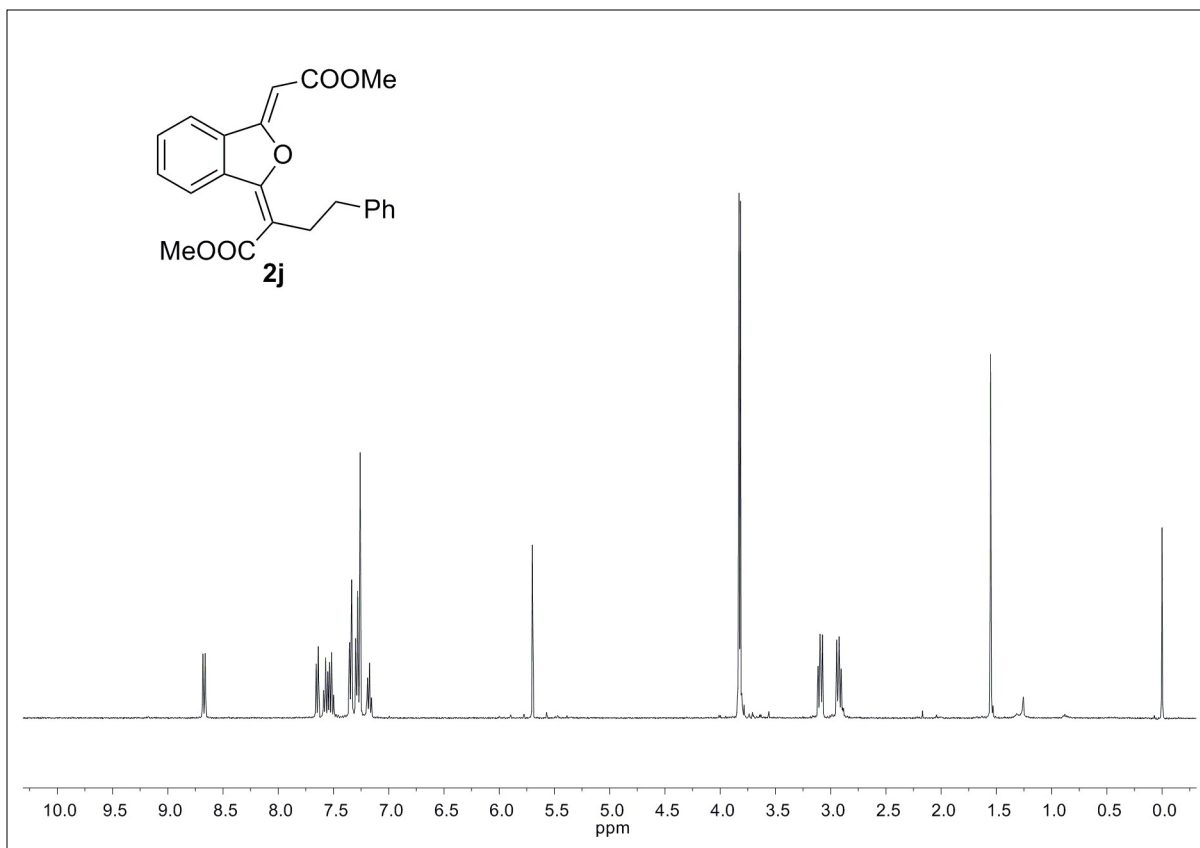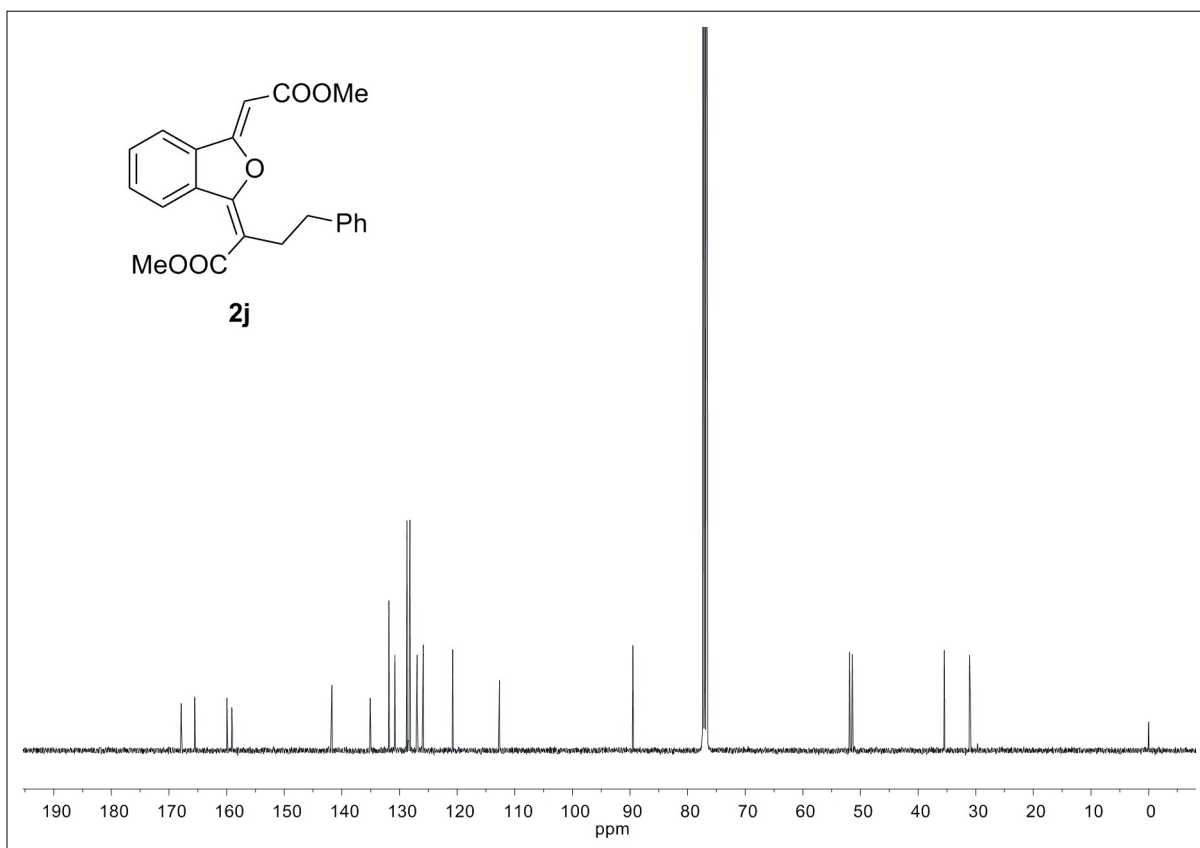

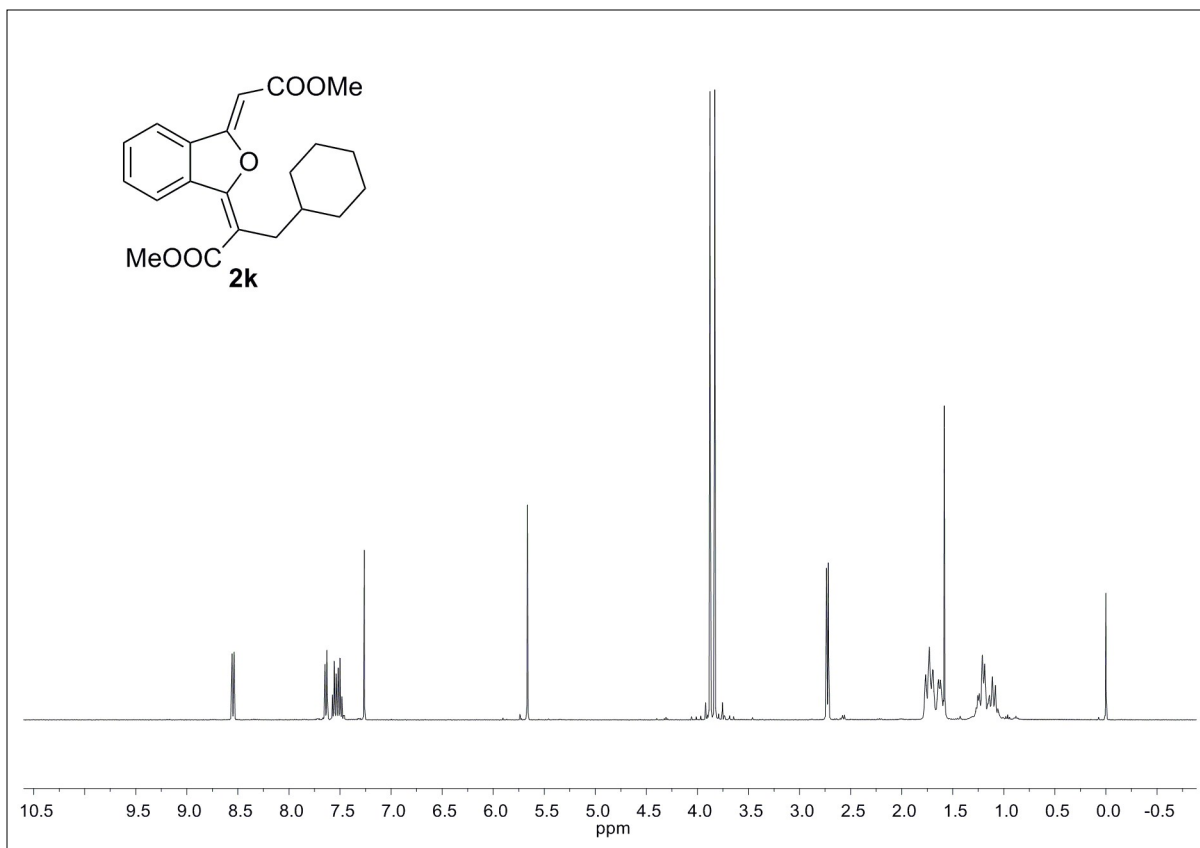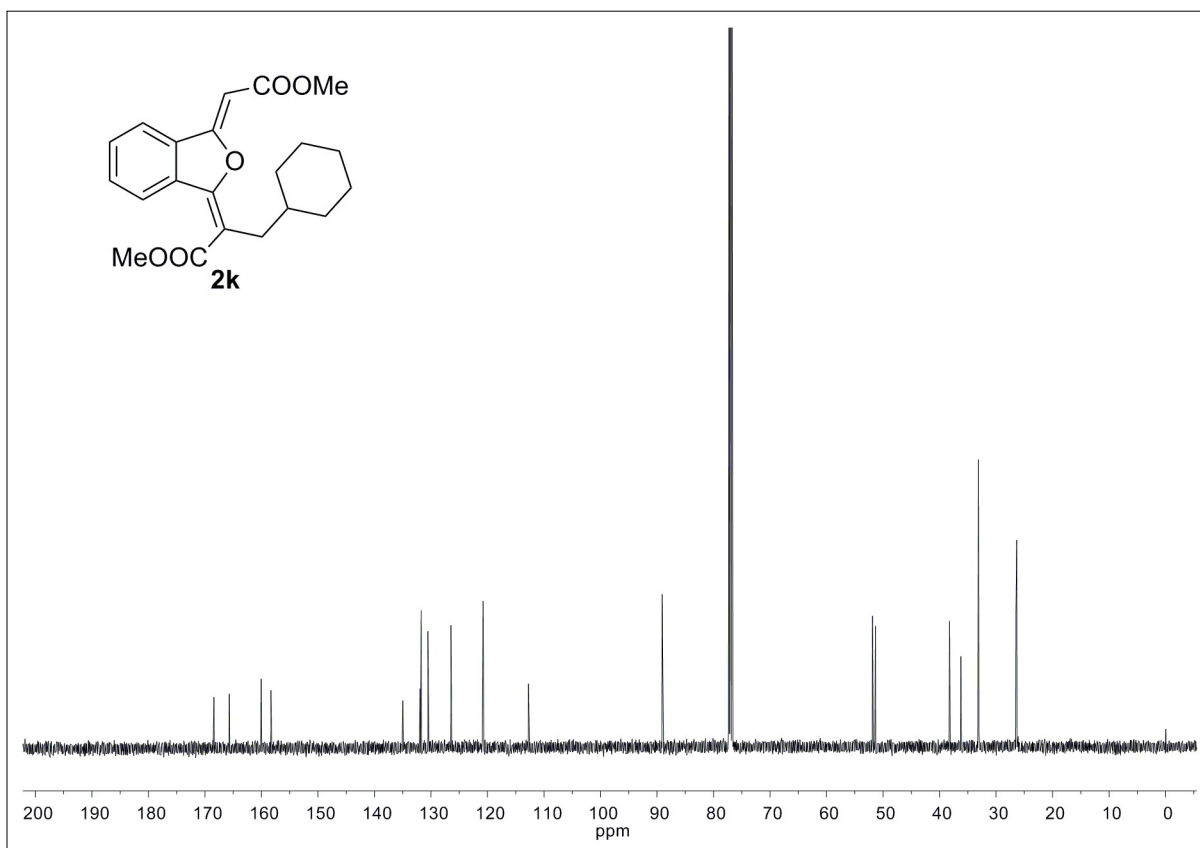

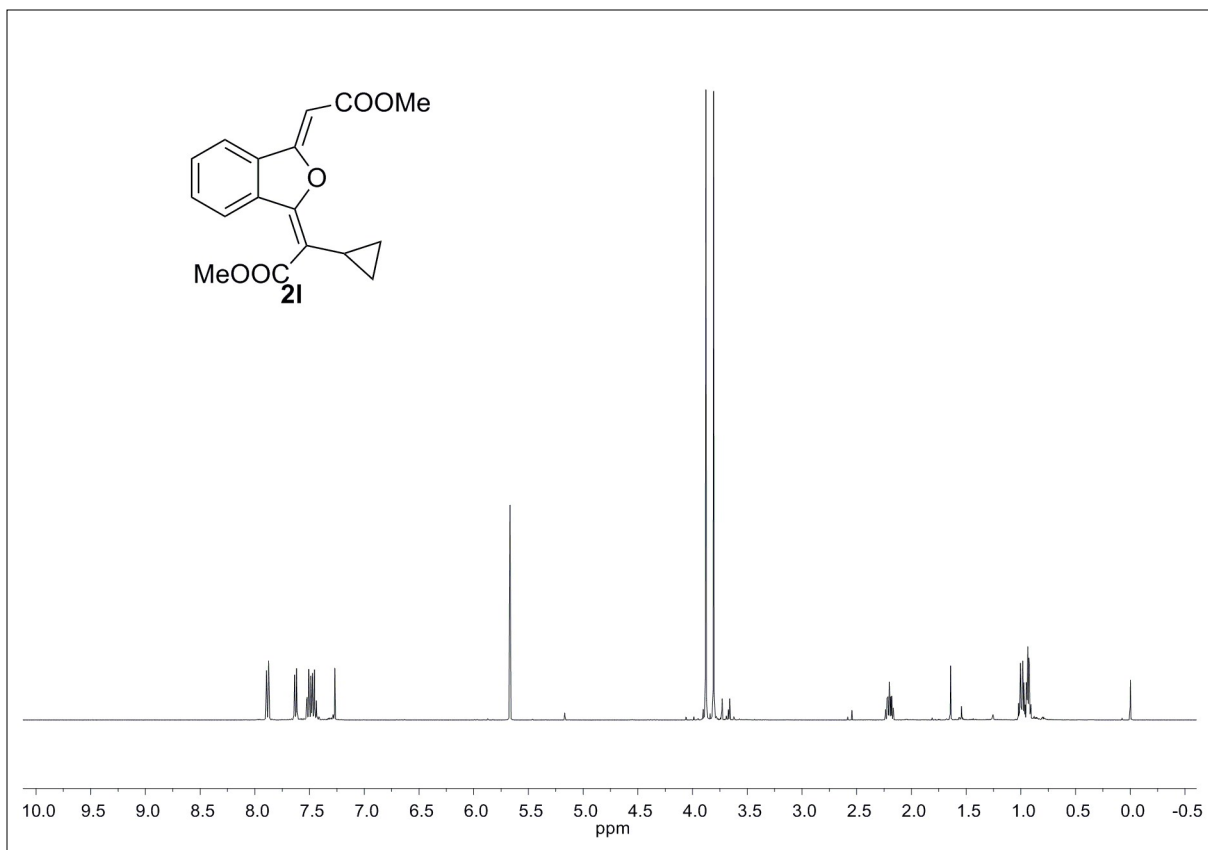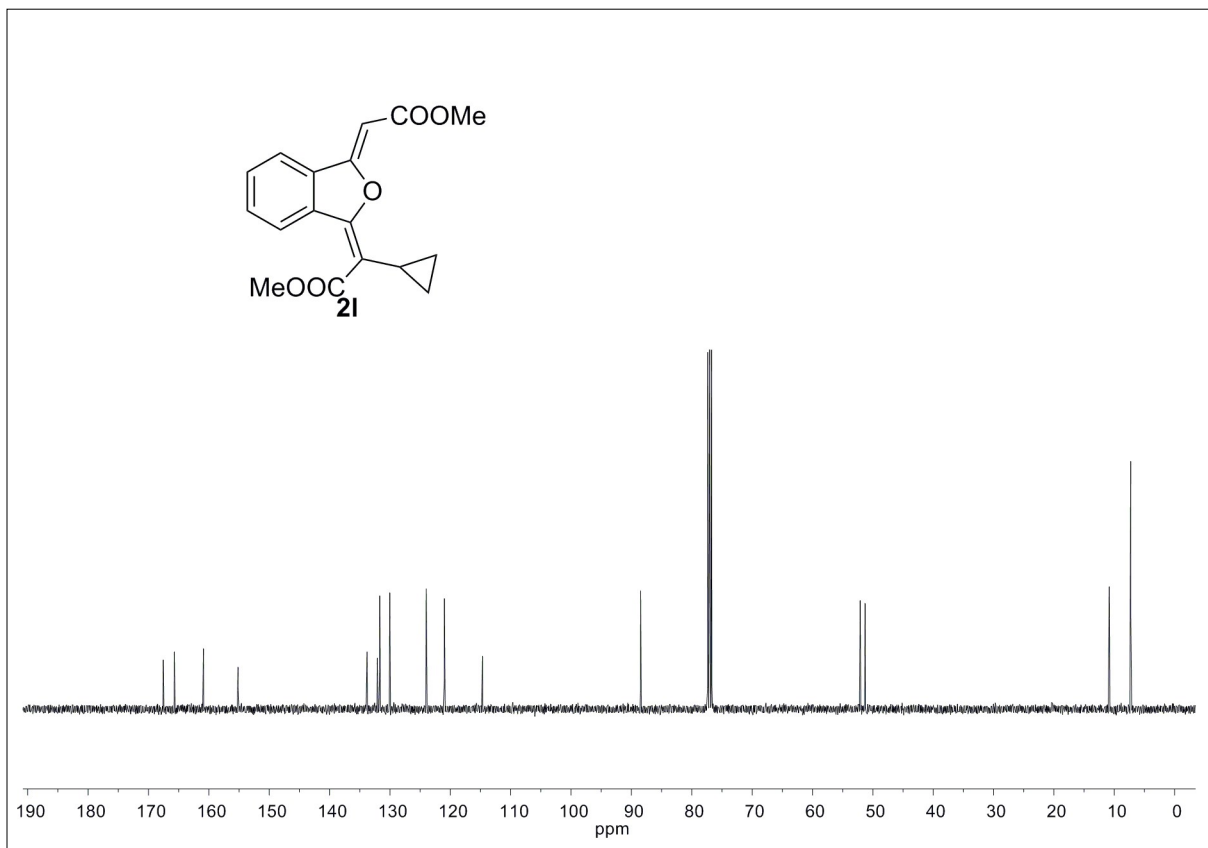

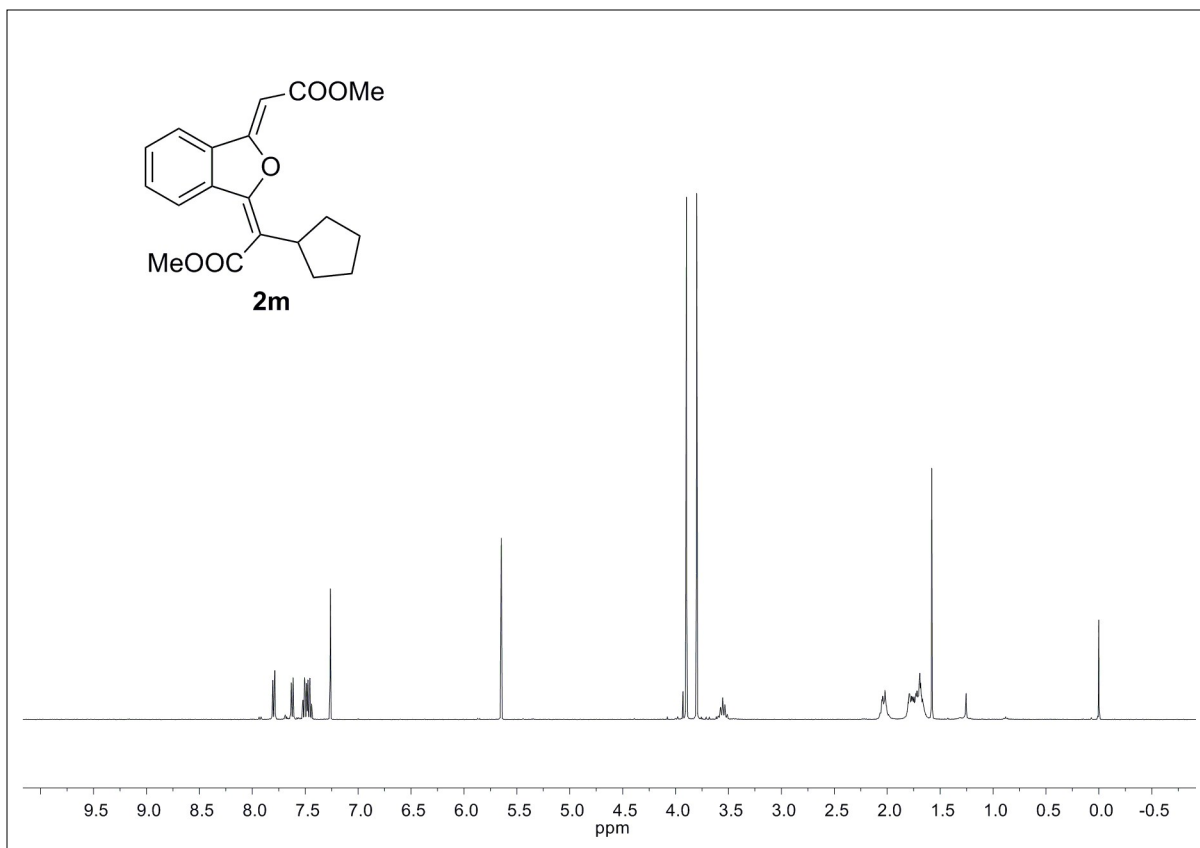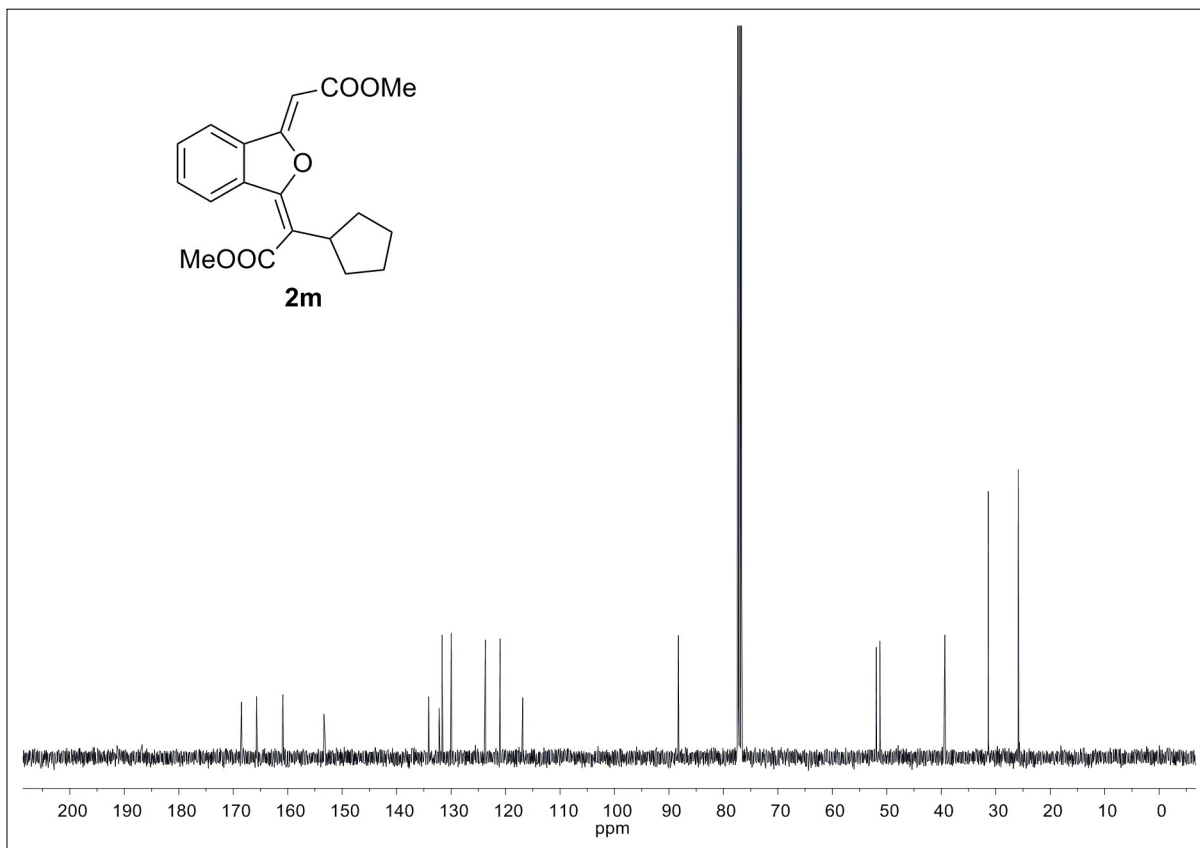

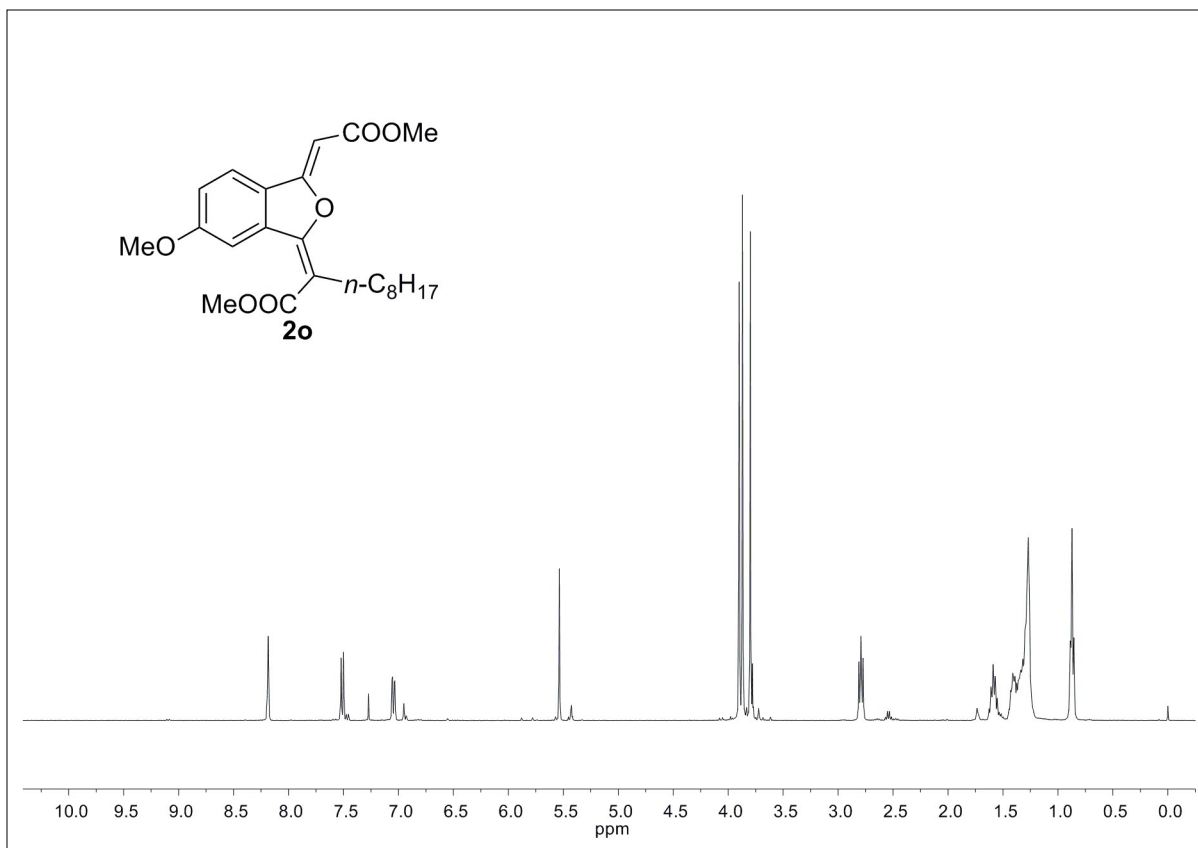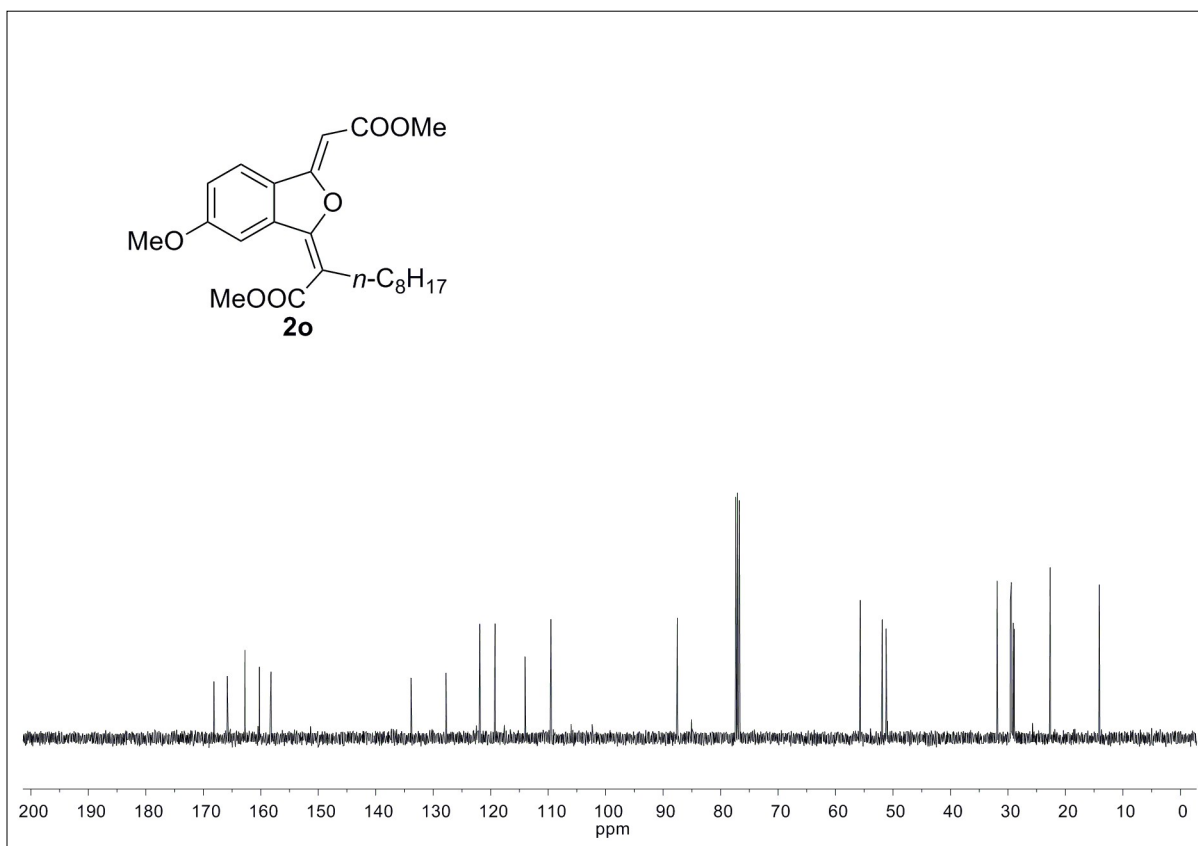

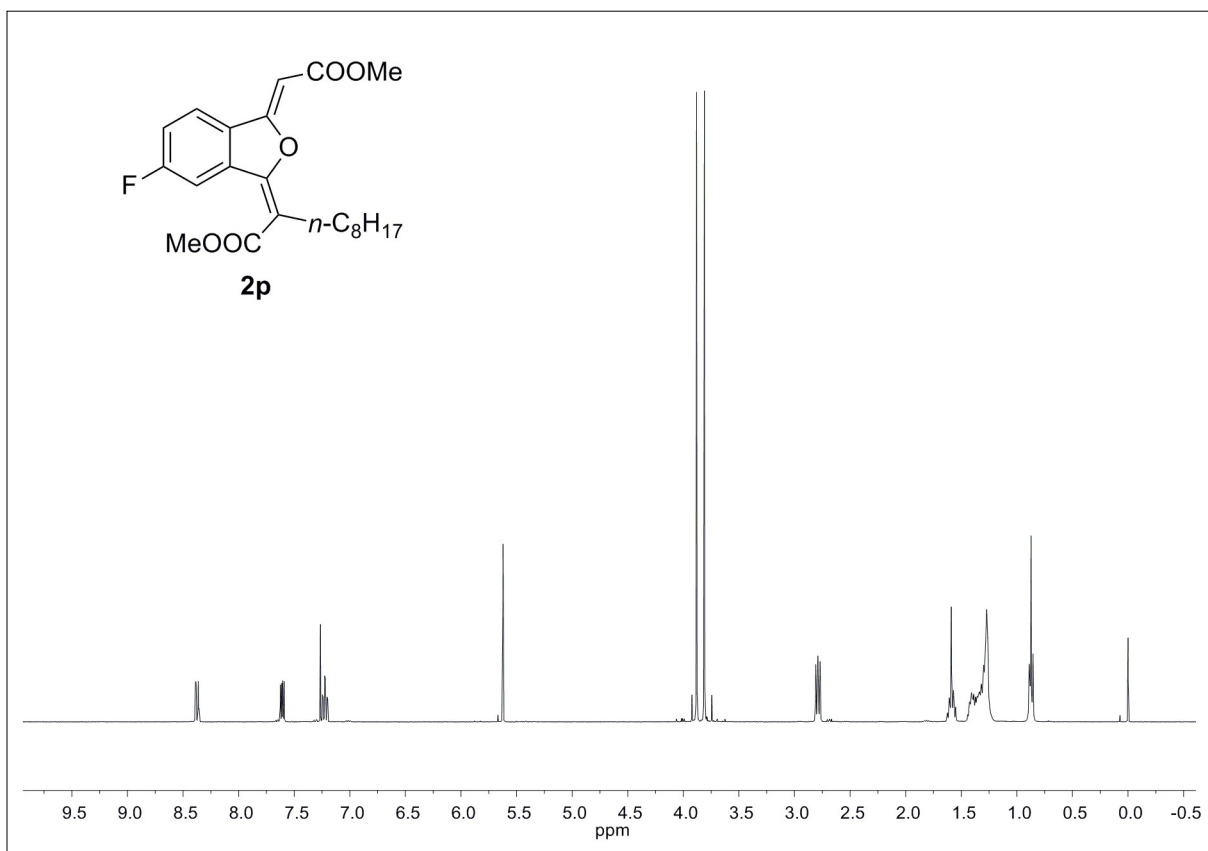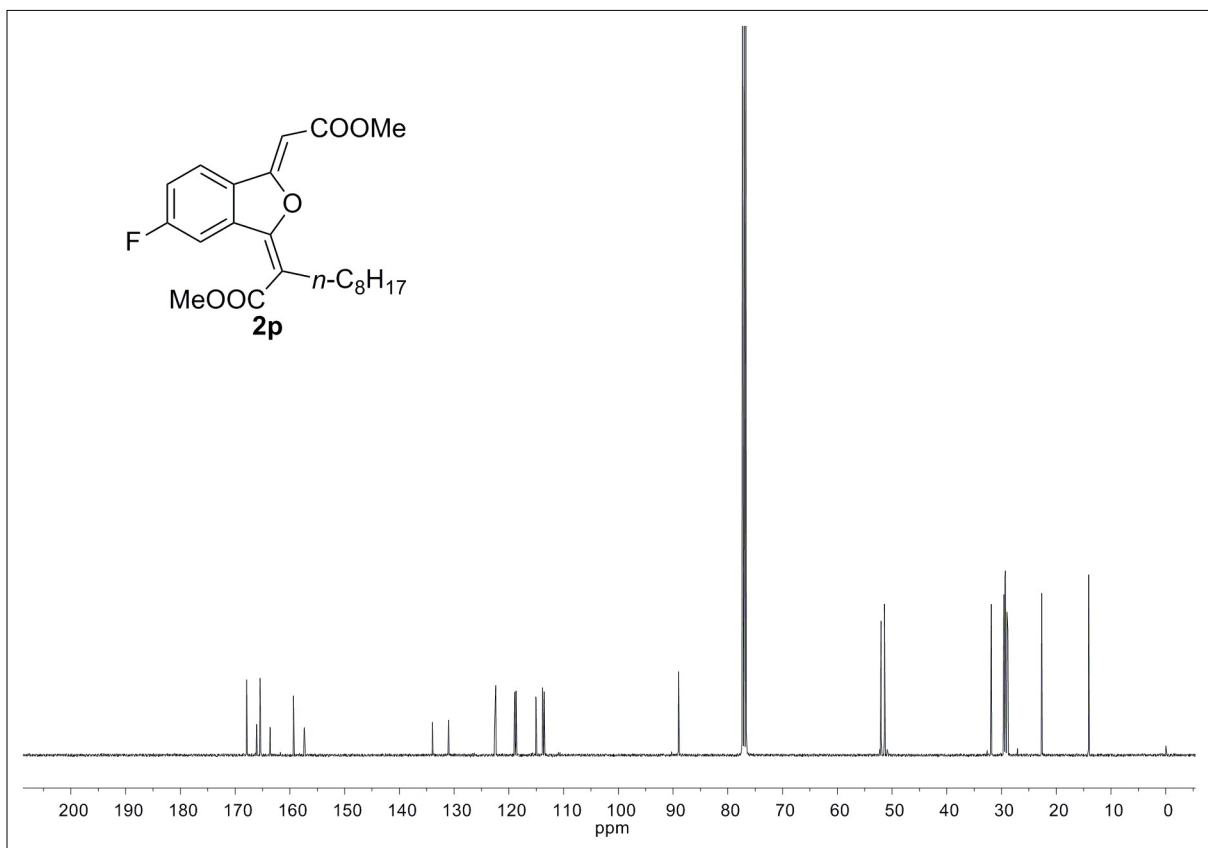



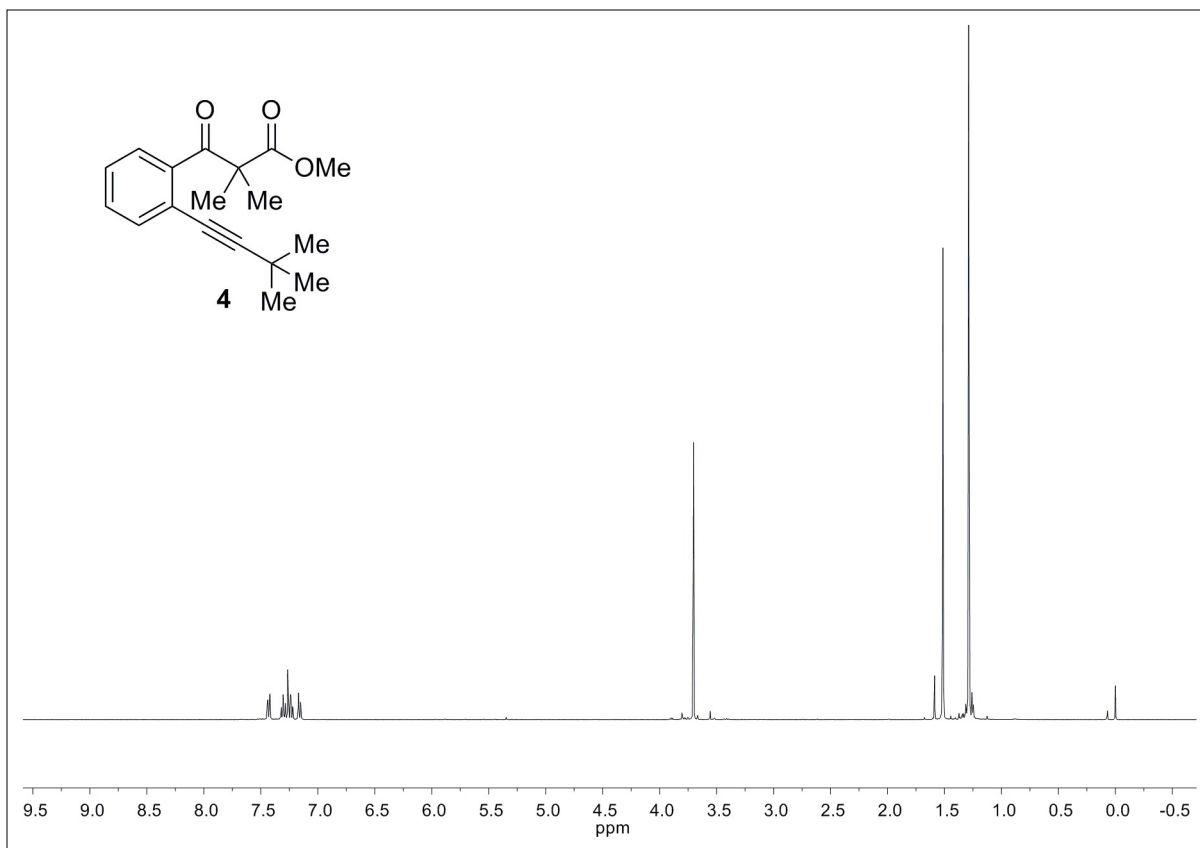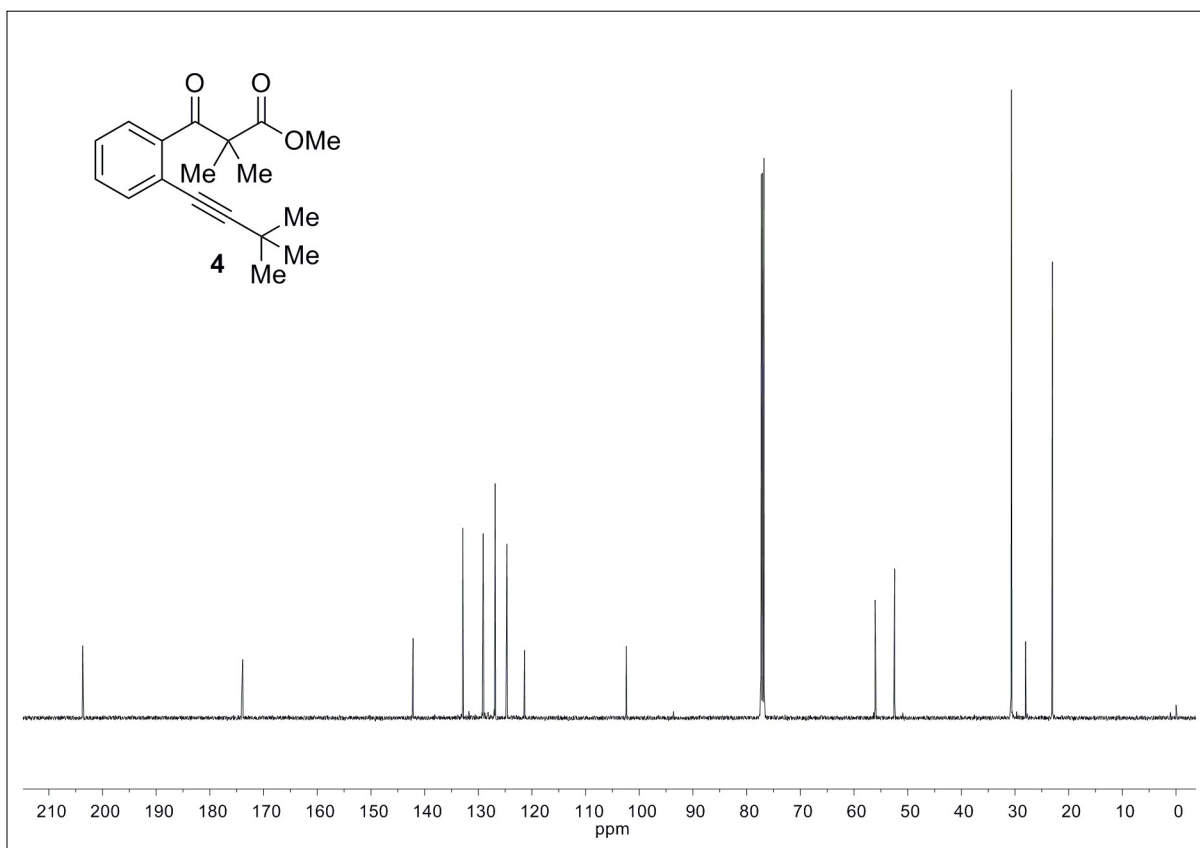

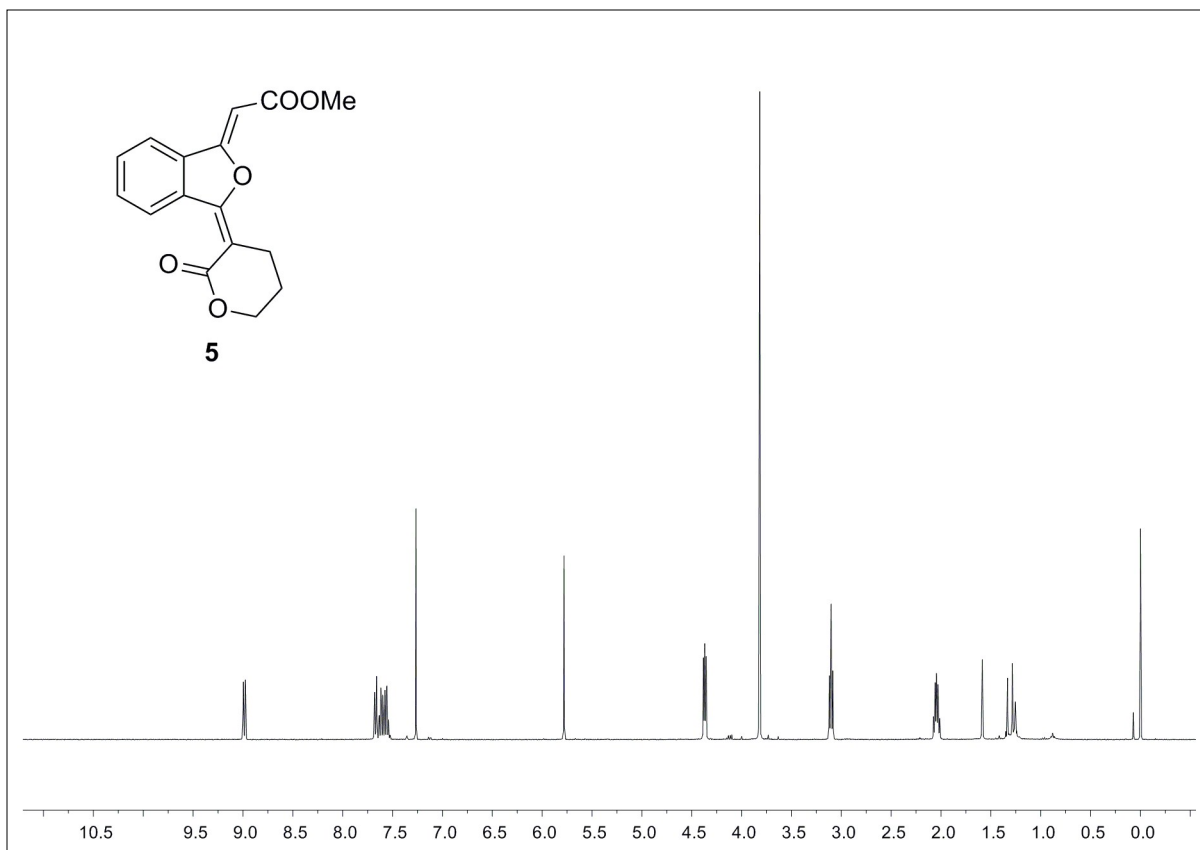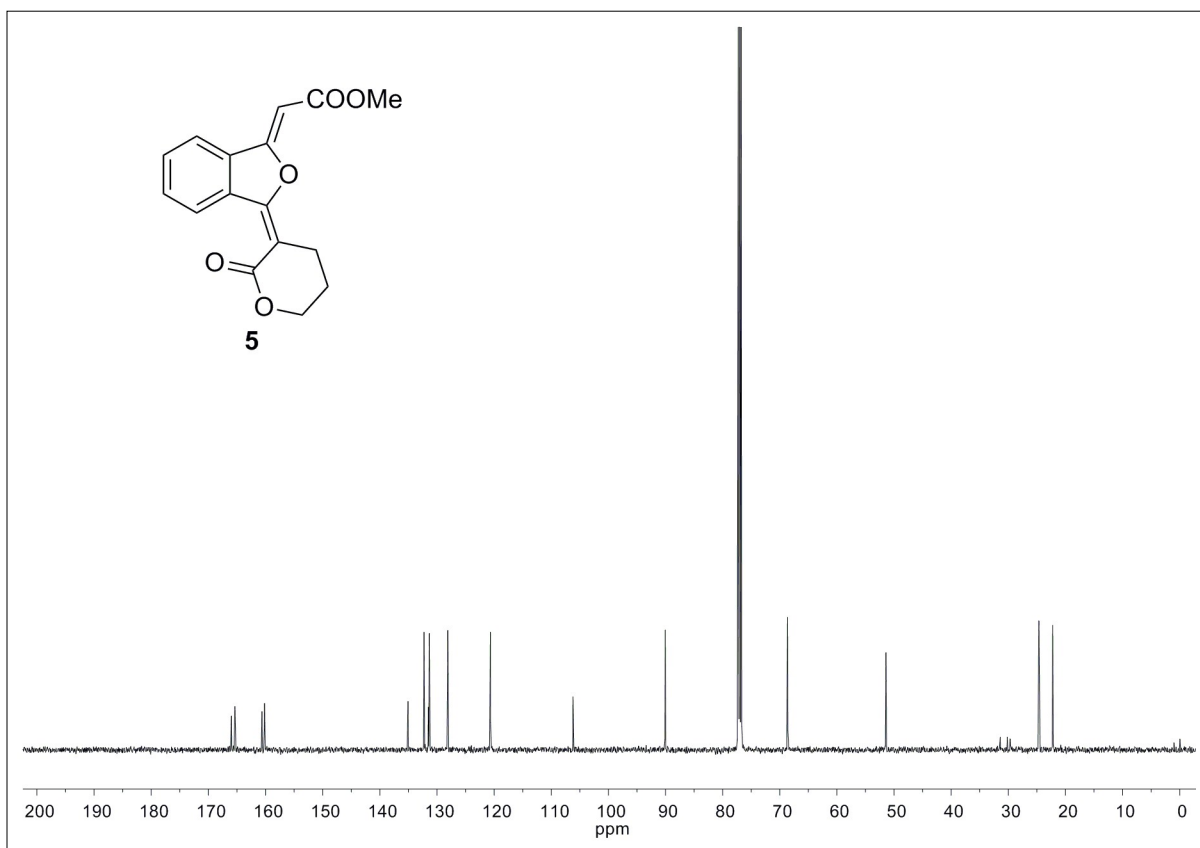

Supplement: c5qo00374a1.pdf [file c5qo00374a1.pdf]
